1 **Regulation of the MLH1-MLH3 endonuclease in meiosis**

2

3 **Elda Cannavo<sup>1#</sup>, Aurore Sanchez<sup>1#</sup>, Roopesh Anand<sup>1,2#</sup>, Lepakshi Ranjha<sup>1,2</sup>,**  
4 **Jannik Hugener<sup>3</sup>, Céline Adam<sup>4,5</sup>, Ananya Acharya<sup>1,3</sup>, Nicolas Weyland<sup>2</sup>, Xa-**  
5 **vier Aran-Guiu<sup>6</sup>, Jean-Baptiste Charbonnier<sup>7,8</sup>, Eva R. Hoffmann<sup>6,9</sup>, Valérie**  
6 **Borde<sup>4,5</sup>, Joao Matos<sup>3</sup> and Petr Cejka<sup>1,3</sup>**

7

8 Affiliations:

9 <sup>1</sup>Institute for Research in Biomedicine, Università della Svizzera italiana (USI),  
10 Faculty of Biomedical Sciences, Switzerland

11 <sup>2</sup>Institute of Molecular Cancer Research, University of Zürich, Zürich, Switzerland

12 <sup>3</sup>Department of Biology, Institute of Biochemistry, Eidgenössische Technische  
13 Hochschule (ETH), Zürich, Switzerland

14 <sup>4</sup>Institut Curie, PSL Research University, CNRS UMR3244, Paris, France

15 <sup>5</sup>Paris Sorbonne Université, Paris, France

16 <sup>6</sup>Genome Damage and Stability Centre, School of Life Sciences, University of Sus-  
17 sex, Brighton, UK

18 <sup>7</sup>I2BC, iBiTec-S, CEA, CNRS UMR 9198, Université Paris-Sud, Gif-sur-Yvette,  
19 France;

20 <sup>8</sup>Université Paris Sud, Orsay, France

21 <sup>9</sup> DNRF Center for Chromosome Stability, Department of Cellular and Molecular  
22 Medicine, Faculty of Health Sciences, University of Copenhagen, Copenhagen,  
23 Denmark

24

25 # These authors contributed equally.

26

27 Materials & Correspondence: Petr Cejka, Institute for Research in Biomedicine,  
28 Via Vincenzo Vela 6, 6500 Bellinzona, Switzerland;

29 E-mail: petr.cejka@irb.usi.ch

30

31 **Summary**

32

33 During prophase of the first meiotic division, cells deliberately break their DNA.

34 These DNA breaks are repaired by homologous recombination, which facilitates

35 proper chromosome segregation and enables reciprocal exchange of DNA seg-

36 ments between homologous chromosomes, thus promoting genetic diversity in

37 the progeny<sup>1</sup>. A successful completion of meiotic recombination requires nucleo-

38 lytic processing of recombination intermediates. Genetic and cellular data impli-

39 cated a pathway dependent on the putative MLH1-MLH3 (MutL $\gamma$ ) nuclease in gen-

40 erating crossovers, but mechanisms that lead to its activation were unclear<sup>2-4</sup>.

41 Here, we have biochemically reconstituted key elements of this pro-crossover

42 pathway. First, we show that human MSH4-MSH5 (MutS $\gamma$ ), which was known to

43 support crossing over<sup>5-7</sup>, binds branched recombination intermediates and phys-

44 ically associates with MutL $\gamma$ . This helps stabilize the ensemble at joint molecule

45 structures and adjacent dsDNA. Second, we show that MutS $\gamma$  directly stimulates

46 DNA cleavage by the MutL $\gamma$  endonuclease, which demonstrates a novel and unex-

47 pected function for MutS $\gamma$  in triggering crossing-over. Third, we find that MutL $\gamma$

48 activity is further stimulated by EXO1, but only when MutS $\gamma$  is present. Fourth,

49 we also identify the replication factor C (RFC) and the proliferating cell nuclear

50 antigen (PCNA) as additional components of the nuclease ensemble, and show

51 that *S. cerevisiae* strains expressing PIP box-mutated MutL $\gamma$  present striking de-

52 fects in forming crossovers. Finally, we show that the MutL $\gamma$ -MutS $\gamma$ -EXO1-RFC-

53 PCNA nuclease ensemble preferentially cleaves DNA with Holliday junctions, but

54 shows no canonical resolvase activity. Instead, the multilayered nuclease ensem-

55 ble likely processes meiotic recombination intermediates by nicking dsDNA adja-

56 cent to junction points<sup>8</sup>. Since DNA nicking by MutL $\gamma$  is dependent on its co-fac-

57 tors, the asymmetric distribution of MutS $\gamma$  and RFC/PCNA on meiotic recombina-

58 tion intermediates may drive biased DNA cleavage. This unique mode of MutL $\gamma$

59 nuclease activation might explain crossover-specific processing of Holliday junc-

60 tions within the meiotic chromosomal context<sup>3,9</sup>.

61

62

## 63 **Introduction**

64 In the prophase of the first meiotic division, SPO11-catalyzed DNA double-strand  
65 breaks (DSBs) are repaired by homologous recombination<sup>10</sup>. Joint molecules,  
66 such as double Holliday junctions (HJs) or their precursors, arise during recom-  
67 bination and must be ultimately resolved so that chromosomes are properly seg-  
68 regated<sup>1,11</sup>. A key factor that was implicated in joint molecule metabolism in mei-  
69 otic cells of most organisms is MutLγ (MLH1-MLH3)<sup>2,3,12-15</sup>. Mice lacking MLH1 or  
70 MLH3 are infertile<sup>15,16</sup>, and defects in this pathway may explain infertility in hu-  
71 mans<sup>17</sup>. In yeast, MutLγ, together with a group of proteins including MutSγ (Msh4-  
72 Msh5) and other meiosis-specific ZMM proteins (for Zip, Msh, Mer), as well as  
73 Exo1, is responsible for the majority of crossovers resulting from biased resolu-  
74 tion of meiotic recombination intermediates<sup>1,3,5</sup>. The meiotic recombination func-  
75 tion of yeast MutLγ is dependent on the integrity of the metal binding  
76 DQHA(X)<sub>2</sub>E(X)<sub>4</sub>E motif within Mlh3, implicating the nuclease of Mlh3 in resolving  
77 recombination intermediates<sup>2,3,18,19,56</sup>. Despite wealth of genetic and cellular data,  
78 the mechanisms that control the MutLγ nuclease and lead to biased joint molecule  
79 processing remained undefined.

80

81

82

83

84

## 85 **Results**

86

### 87 **Human MutLy is an ATP-stimulated endonuclease**

88 To study human MutLy (hMLH1-hMLH3), we expressed and purified the hetero-  
89 dimer from insect cells (Fig. 1a and Extended Data Fig. 1a,b). Similarly to the mis-  
90 match repair (MMR)-specific hMutL $\alpha$  (hMLH1-hPMS2)<sup>20</sup>, the hMLH1-hMLH3  
91 complex non-specifically nicked double-stranded supercoiled DNA (scDNA) in the  
92 presence of manganese without any other protein co-factor (Fig. 1b,c, Extended  
93 Data Fig. 1c), while almost no activity was observed with magnesium (Extended  
94 Data Fig. 1d), which is believed to be the specific metal co-factor<sup>20</sup>. Mutations in  
95 the conserved metal binding motif of hMLH3 abolished the endonuclease, indicat-  
96 ing that the DNA cleavage activity was intrinsic to the hMutLy heterodimer (Fig.  
97 1d, see also Extended Data Fig. 1e). ATP promoted the nuclease activity >2-fold  
98 (Fig. 1d,e, Extended Data Fig. 1f-h). Experiments with various ATP analogs re-  
99 vealed that ATP hydrolysis by hMLH1-hMLH3 was required for the maximal stim-  
100 ulation of DNA cleavage (Fig. 1f, Extended Data Fig. 1h). The N-termini of both  
101 hMLH1 and hMLH3 proteins contain conserved Walker motifs implicated in ATP  
102 binding and hydrolysis<sup>21</sup>. To define whether the ATPase of hMLH1, hMLH3 or  
103 both subunits of the heterodimer promotes its nucleolytic activity, we prepared  
104 the respective hMutLy variants with mutations in the conserved motifs of either  
105 subunit individually or combined (Fig. 1g, Extended Data Fig. 1i)<sup>21</sup>. We observed  
106 that the integrity of the ATPase domain of hMLH1, and to a much lesser degree of  
107 hMLH3, promoted the nuclease activity of hMLH1-hMLH3 (Fig. 1g, Extended Data  
108 Fig. 1j). The hMutLy complex did not cleave oligonucleotide-based HJ DNA (Ex-  
109 tended Data Fig. 1k). Yeast and human MutLy complexes bind DNA with a prefer-  
110 ence towards branched structures such as Holliday junctions<sup>18,22</sup>. The stimulation  
111 of DNA cleavage by hMutLy with ATP can be in part explained by an increased  
112 affinity of the heterodimer to DNA when ATP was present (Extended Data Fig. 2a-  
113 c). Without ATP, the ATPase-deficient variants of hMLH1-hMLH3 bound DNA in-  
114 distinguishably from the wild type complex (Extended Data Fig. 2a,d). Our results  
115 thus establish that hMLH1-hMLH3 is a nuclease that nicks dsDNA. The

116 endonuclease requires the metal-binding motif within hMLH3 and is promoted  
117 upon ATP hydrolysis.

118

### 119 **MutSy and MutLy interact and stabilize each other at DNA junctions**

120 Previously, recombinant hMSH4-hMSH5 was shown to bind HJs<sup>6</sup>. We found that  
121 the human and yeast MutSy complexes bound even better precursors of HJs such  
122 as D-loops (Fig. 2a-b, Extended Data Fig. 3a-d). This is in agreement with a pro-  
123 posed early function of MutSy and other ZMM proteins to stabilize nascent strand  
124 invasion intermediates that mature into single-end invasions, which helps ensure  
125 their crossover designation<sup>7,23</sup>. In contrast, single-stranded DNA (ssDNA) or  
126 dsDNA was not bound by MutSy, establishing thus the binding preference of the  
127 heterodimer to branched DNA structures (Fig. 2b, Extended Data Fig. 3a-d), simi-  
128 larly to MutLy<sup>18,22</sup>. Electrophoretic mobility shift assays demonstrated that the  
129 MutSy and MutLy complexes moderately stabilized each other at DNA junctions,  
130 which required the interplay of the cognate heterodimers (Extended Data Fig. 4a-  
131 d). Accordingly, the respective human or yeast MutSy and MutLy complexes di-  
132 rectly physically interact (Fig. 2c and Extended Data Fig. 4e-g)<sup>24</sup>. The very slow  
133 migration of the protein-DNA complexes was indicative of multiple units of the  
134 heterocomplexes bound to the DNA substrate (Extended Data Fig. 4h,i), as shown  
135 previously for yeast MutLy<sup>18</sup>. We note that the presence of DNA junctions was es-  
136 sential for stable DNA binding (Extended Data Fig. 4a,c), which supports a model  
137 where a branched DNA structure serves as a nucleation point for a hMutSy-  
138 hMutLy filament that then extends to the adjacent dsDNA arms<sup>25</sup>.

139

### 140 **hMutSy directly promotes the endonuclease activity of hMutLy**

141 Previous *in vivo* experiments implicated MutSy in the stabilization of nascent DNA  
142 joint molecules early in the meiotic pro-crossover pathway<sup>6,24,26</sup>, but whether  
143 MutSy is directly involved later in nucleolytic processing was not clear. Using our  
144 reconstituted system, we observed ~3-fold stimulation of hMLH1-hMLH3 endo-  
145 nuclease by hMSH4-hMSH5 (Fig. 2d, Extended Data Fig. 5a-c), which was depend-  
146 ent on the hMLH3 metal binding motif (Fig. 2e). ATP promoted DNA cleavage by  
147 the hMutSy-hMutLy ensemble, and as in reactions with hMutLy alone, maximal

148 nuclease activity was observed when ATP hydrolysis was possible (Fig. 2f). The  
149 ATP binding/hydrolysis motifs in hMLH1 and hMSH5 were both crucial, while the  
150 motif in hMSH4 was less important and in hMLH3 appeared dispensable (Fig.  
151 2g,h, Extended Data Fig. 5d,e). The ATPase motif mutations in hMSH4 or hMSH5  
152 instead did not affect the capacity of the two subunits to form a complex or bind  
153 DNA (Extended Data Fig. 5f,g). The stimulatory effect was likely dependent on di-  
154 rect physical interactions between the cognate heterodimers, as yeast Msh4-  
155 Msh5 did not promote the nuclease of human MutL $\gamma$  (Extended Data Fig. 5h). The  
156 hMutS $\gamma$ -hMutL $\gamma$  complex cleaved similarly both supercoiled and relaxed DNA  
157 (Extended Data Fig. 5i) and exhibited no detectable structure-specific nuclease or  
158 resolvase activity (Extended Data Fig. 5j,k).

159 To determine whether the MMR-specific human MutS homologue complexes  
160 could also promote hMutL $\gamma$ , we supplemented hMLH1-hMLH3 reactions with re-  
161 combinant hMutS $\alpha$  (hMSH2-hMSH6) or hMutS $\beta$  (hMSH2-hMSH3) (Fig. 2i-j).  
162 hMutS $\beta$ , but not hMutS $\alpha$ , could also stimulate the hMLH1-hMLH3 nuclease (Fig.  
163 2k). This agrees with previous experiments showing that yeast MutL $\gamma$  could par-  
164 tially substitute MutL $\alpha$  in the repair of insertion/deletion mismatches in MMR<sup>27</sup>.  
165 These data also underpin the involvement of hMutL $\gamma$  in the metabolism of trinucleotide  
166 repeats linked to several neurodegenerative diseases, as well as rare  
167 hMLH3 mutations found in patients with hereditary nonpolyposis colorectal cancer  
168 (HNPCC)/Lynch syndrome characterized by microsatellite instability<sup>28-32,56</sup>.

169

### 170 **hEXO1 promotes the nuclease activity of hMutS $\gamma$ -hMutL $\gamma$**

171 Genetic experiments with budding yeast revealed a structural (nuclease-inde-  
172 pendent) function of Exo1 in the Mlh1-Mlh3 pro-crossover pathway<sup>4</sup>. The effect  
173 was dependent on its direct interaction with the Mlh1 subunit of the yMutL $\gamma$  het-  
174 erodimer<sup>4,33</sup>, but it was unclear whether the interplay directly affects the Mlh3  
175 endonuclease, and whether this function is conserved in higher eukaryotes. While  
176 hEXO1 is likely one of the nucleases that function in MMR to exonucleolytically  
177 remove the DNA stretch containing the mismatch, its role in the initial endonucle-  
178 olytic cleavage catalyzed by hMutL $\alpha$  was not reported<sup>20</sup>. To test the effect of  
179 hEXO1 on the nuclease of hMLH1-hMLH3, we used the nuclease-deficient

180 hEXO1(DA) variant to prevent degradation of the resulting nicked DNA (Fig. 3a,  
181 Extended Data Fig. 6a). We observed no effect of hEXO1(DA) on the nuclease of  
182 hMLH1-hMLH3 alone, but hEXO1(DA) promoted DNA cleavage ~2-3-fold when  
183 hMSH4-hMSH5 was present (Fig. 3b,c and Extended Data Fig. 6b). More than 40%  
184 DNA cleavage was observed using 20 nM concentration of the multi-protein en-  
185 semble (Fig. 3c). Compared to DNA cleavage efficiency by 400 nM hMLH1-MLH3  
186 alone in reactions without ATP (Fig. 1b,c), this corresponds to >20-fold stimula-  
187 tion of nuclease activity by the respective co-factors.

188 In contrast to hMSH4-hMSH5 that stabilized hMLH1-hMLH3 on DNA, we de-  
189 tected no such capacity of hEXO1(DA) (Extended Data Fig. 6c,d). Yeast Exo1(DA)  
190 could not substitute human EXO1(DA) in the nuclease assays (Fig. 3d), in agree-  
191 ment with a direct physical interaction between human hEXO1(DA) and hMLH1-  
192 hMLH3 (Fig 3e). We also note that the ensemble was inefficient in cleaving DNA  
193 opposite to nicks, showing that nicks are unlikely to direct the endonuclease (Ex-  
194 tended Data Fig. 6e). Finally, hEXO1(DA) did not promote the nuclease of hMLH1-  
195 hMLH3 in conjunction with the MMR-specific hMSH2-hMSH3 complex (Fig. 3f),  
196 indicating that hEXO1 likely specifically promotes the endonuclease activity of  
197 hMutSy-hMutLy involved in meiotic recombination.

198

### 199 **RFC-PCNA promote the activity of the MutSy-hEXO1(DA)-MutLy nuclease** 200 **ensemble**

201 We next set out to test whether hMLH1-hMLH3 with its co-factors can catalyze  
202 DNA cleavage under physiological conditions in magnesium. While almost no nu-  
203 clease activity of hMLH1-hMLH3 alone in magnesium was observed, weak nicking  
204 was seen in the presence of hMSH4-hMSH5, and the reactions were further stim-  
205 ulated by hEXO1(DA) (Fig. 4a). As RFC-PCNA are known to promote the hMLH1-  
206 hPMS2 (hMutL $\alpha$ ) endonuclease in MMR<sup>20</sup>, we tested for their effect on hMutLy.  
207 Notably, we observed additional ~2-fold stimulation of DNA cleavage by the nu-  
208 clease ensemble when RFC-PCNA complex was present (Fig. 4a, compare lanes 7  
209 and 10, Extended Data Fig. 7a-c). The reactions with hMutLy-hMutSy-hEXO1-RFC-  
210 PCNA were dependent on the integrity of the hMLH3 metal-binding motif (Fig. 4a,  
211 lane 11). Yeast RFC is capable of loading human PCNA, and could readily

212 substitute human RFC in reconstituted MMR reactions<sup>20</sup>. In accord, we observed  
213 the stimulatory effect on the hMLH1-hMLH3 ensemble when using yeast RFC and  
214 human PCNA, but not when using yeast RFC and yeast PCNA (Fig. 4a, lane 13).  
215 Also, no stimulation was detected when RFC was omitted from the reaction mix-  
216 ture containing human PCNA (Fig. 4a, lane 14), indicating that PCNA must likely  
217 be actively loaded onto DNA by RFC, as during MMR<sup>20,34,35</sup>. Accordingly, PCNA is  
218 known to be efficiently loaded onto intact negatively supercoiled DNA<sup>34</sup>. In sum-  
219 mary, we show that while hMutLy *per se* is a poor nuclease that requires manga-  
220 nese, hMutSy, hEXO1 and RFC-PCNA activate it to cleave efficiently in a buffer con-  
221 taining physiological magnesium, and the reaction is no longer stimulated by add-  
222 ing manganese (Fig. 4b, see also Extended Data Fig. 7d). The omission of hMSH4-  
223 hMSH5 or hEXO1(DA) resulted in a strong reduction of the ensemble nuclease  
224 activity (Fig. 4c), demonstrating the requirement for the multiple co-factors to  
225 simultaneously stimulate hMutLy. RFC-PCNA could also promote the nuclease of  
226 hMLH1-hMLH3 alone, although to a much lesser extent (Fig. 4d), suggesting that  
227 hMutSy and hEXO1(DA) are not strictly required to mediate the stimulatory effect  
228 of RFC-PCNA. In accord, we found that hMutLy directly physically interacts with  
229 hPCNA (Fig. 4e).

230 ATP was necessary for the nuclease activity of the ensemble, and could not be  
231 replaced by ADP or AMP-PNP, showing that ATP hydrolysis was required (Fig. 4f,  
232 Extended Data Fig. 7e). In contrast to the reactions in manganese, the integrity of  
233 the ATPase motifs of all four hMutSy and hMutLy subunits was required for max-  
234 imal cleavage activity (Fig. 4g), in agreement with meiotic defects of the corre-  
235 sponding ATPase-deficient yeast mutant strains<sup>21,23</sup>.

236 Notably, the nuclease ensemble preferentially cleaved plasmid-length DNA  
237 with palindromic repeats forming a HJ-like structure (Fig. 4h), in agreement with  
238 the binding preference of the hMutSy and hMutLy heterodimers to these recom-  
239 bination intermediates. However, the activity of the complex on the cruciform  
240 DNA primarily yielded nicked products (Fig. 4h), unlike canonical HJ resolvases  
241 that give rise to linear DNA upon concerted cleavage of both DNA strands at the  
242 junction points<sup>36</sup>. We note that we did not observe any cleavage of model HJ or D-  
243 loop oligonucleotide-based substrates (Extended Data Fig. 7f). Our data suggest  
244 that the hMutLy ensemble processes recombination intermediates by resolution-



245 independent nicking, in agreement with results obtained from sequencing of het-  
246 eroduplex DNA arising during meiosis in yeast cells, which indicated cleavage by  
247 nicking some distance away from the DNA junction points<sup>8</sup>.

248 Interactions with PCNA are often mediated by a PCNA-interacting peptide  
249 (PIP) motif<sup>37</sup>. We supplemented the hMutLy ensemble nuclease assays with a PIP-  
250 box peptide derived from p21<sup>38</sup>, or a control peptide with key residues mutated.  
251 The competing PIP-box peptide eliminated the stimulatory effect of RFC-PCNA,  
252 while the control peptide had no effect (Fig. 5a, concentration of the peptide was  
253 ~5-fold over  $K_d$  for PCNA<sup>38</sup>), demonstrating that the PCNA function in stimulating  
254 the nuclease of the hMutLy ensemble is dependent on an interaction via a PIP-box  
255 like motif. We next analyzed several mutants of conserved PIP-box-like sequences  
256 in MLH1, MLH3 and EXO1(DA)<sup>35,39,40</sup> (Extended Data Fig. 5b, top). The respective  
257 mutations did not notably affect the nuclease reactions *per se* without PCNA or  
258 the capacity to bind DNA (Extended Data Fig. 8a-d), but the mutants became  
259 partly refractory to stimulation by RFC-PCNA, in particular when the PIP-box-like  
260 mutations of multiple factors were combined (Fig. 5b, Extended Data Fig. 8c,e).  
261 Furthermore, the corresponding mutations in the yeast homologues of Mlh1 and  
262 Mlh3 (see scheme at the top of Fig. 5b) resulted in meiotic defects, as indicated by  
263 a decrease in the frequency of crossovers at *CEN8-THR1* leading to chromosome  
264 non-disjunction and reduced spore viability (Fig. 5c,d, Extended Data Fig. 9a). We  
265 also found yeast Mlh1 and Mlh3 as a part of a complex with yRfc1 in meiotic cells  
266 at the time of joint molecule resolution (Fig. 5e). Finally, using chromatin im-  
267 munoprecipitation and synchronous meiotic yeast cultures, we observed an en-  
268 richment of yRfc1 at both natural and engineered DSB hotspots in late meiosis at  
269 the time when joint molecules are resolved into crossovers (Fig. 5f), which coin-  
270 cides with the accumulation of Mlh3 at the same hotspots (V. Borde, manuscript  
271 in preparation). The accumulation of yRfc1 at sites of recombination was inde-  
272 pendent of Mlh3, suggesting it may be present from an earlier step of DNA syn-  
273 thesis (Extended Data Fig. 9b). The function of RFC-PCNA in promoting meiotic  
274 crossovers in the MLH3 pathway is thus likely conserved in evolution.

275

276 **Discussion**

277 The MutL $\gamma$  nuclease in most organisms functions in a pathway that processes a  
278 subset of meiotic joint DNA molecules into crossover recombination products,  
279 and was thus proposed to represent a crossover-specific resolvase<sup>3</sup>. Here we  
280 show that hMSH4-hMSH5, hEXO1 and RFC-PCNA strongly promote the MutL $\gamma$   
281 (hMLH1-hMLH3) nuclease, but we failed to detect any canonical HJ resolvase ac-  
282 tivity. Rather, our data suggest that the nuclease ensemble processes joint mole-  
283 cule intermediates by biased resolution-independent nicking of dsDNA in the vi-  
284 cinity of HJs. Since HJs are symmetric and their resolution can yield both crosso-  
285 vers and non-crossovers<sup>41</sup>, how is the crossover bias established? As hMSH4-  
286 hMSH5 likely stabilizes asymmetric HJ precursors<sup>5</sup>, it is anticipated that the het-  
287 erodimer will be ultimately present asymmetrically later at the mature joint mol-  
288 ecules containing HJs (Extended Data Fig. 10). Similarly, PCNA may be loaded  
289 asymmetrically at joint molecules during DNA synthesis by polymerase  $\delta$ <sup>42</sup>, or at  
290 strand discontinuities before the ligation of double HJs takes place. Asymmetric  
291 localization of MSH4-MSH5 was indeed directly observed by structured-illumina-  
292 tion microscopy in *Caenorhabditis elegans*<sup>43</sup>. Although the crossover-specific res-  
293 olution of DNA junctions in worms is independent of MLH1-MLH3 and depends  
294 on other nucleases, the asymmetric presence of nuclease co-factors might repre-  
295 sent a general mechanism to promote biased joint molecule resolution. In yeast,  
296 the Yen1 nuclease that was artificially activated instead of Mlh1-Mlh3 also led to  
297 crossover-biased resolution, arguing that the nature of the substrate within the  
298 meiotic chromosome context, rather than the Mlh1-Mlh3 nuclease *per se*, directs  
299 the biased resolution<sup>9</sup>. We propose that the asymmetric presence of RFC-PCNA,  
300 MSH4-MSH5 or additional co-factors at joint molecules might provide the signal  
301 to guarantee the biased, crossover-specific processing by the MutL $\gamma$  nuclease (Ex-  
302 tended Data Fig. 10), and the mechanism can be broadly applicable to other or-  
303 ganisms that do not possess MutL $\gamma$ .

304

### 305 **Acknowledgements**

306 This work was supported by grants from the Swiss National Science Foundation  
307 (31003A\_17544) and European Research Council (681-630) to P.C., Institut Curie  
308 and CNRS to V.B., by Agence Nationale de la Recherche (ANR-15-CE11-0011) to  
309 V.B. and J.-B.C. We thank Josef Jiricny (ETH Zurich) and members of the Cejka

310 laboratory for helpful comments on the manuscript and Neil Hunter for communi-  
311 cating results prior to publication.

312

### 313 **Conflict of interest**

314 The authors declare no conflict of interest.

315

### 316 **Author contributions**

317 E.C., A.S., R.A. and P.C. planned, performed and analyzed the majority of the exper-  
318 iments and wrote the paper. L. R. and A. A. performed most of the experiments  
319 with yeast recombinant proteins and electrophoretic mobility shift assays. N. W.  
320 performed experiments to define simultaneous DNA binding by MLH1-MLH3 and  
321 MSH4-MSH5. J. H. performed experiments with yeast *mlh1* and *mlh3* variants mu-  
322 tated in PIP-box-like sequences, and the data were analyzed together with J. M.  
323 Chip experiments and Rfc1-Mlh1 and Rfc1-Mlh3 pulldown assays were carried  
324 out by C. A., the data were analyzed together with V. B. J-B.C. helped prepare the  
325 MLH1-MLH3 expression construct and designed experiments with the PIP-box  
326 peptide. X. A-G. and E.R.H. prepared the MSH4-MSH5 expression construct. All au-  
327 thors contributed to prepare the final version of the manuscript.

328 **Figure legends**

329

330 **Figure 1. Human hMLH1-hMLH3 is an endonuclease.** **a**, Recombinant hMLH1-  
331 hMLH3 (L1-L3) used in this study. **b**, Nuclease assay with hMLH1-hMLH3 and  
332 pUC19-based negatively supercoiled DNA (scDNA) as a substrate. The reaction  
333 with 5 mM manganese acetate was incubated for 60 min at 37 °C. **c**, Quantitation  
334 of assays such as in **b**. Averages shown; error bars, SEM; n=3. **d**, Top, alignment of  
335 metal binding motif in yeast and human MLH3. Alanine substitution mutations  
336 used in this study are in italics. Bottom, nuclease assay as in **b**, but with wild type  
337 hMLH1-hMLH3 (L1-L3) or nuclease-dead L1-L3(3ND) (mutations D1223N,  
338 Q1224K, E1229K) hMLH1-hMLH3 variants, without or with ATP (0.5 mM). **e**,  
339 Quantitation of nuclease assays with hMLH1-hMLH3 without or with ATP (0.5  
340 mM), in the presence of manganese (5 mM). Averages shown; error bars, SEM;  
341 n=4. **f**, Quantitation of assays as in Extended Data Fig. 1h, supplemented with var-  
342 ious nucleotide co-factors and their analogs (0.5 mM). Averages shown; error  
343 bars, SEM; n=4. **g**, Left, alignment of MLH1 and MLH3 ATPase domains from hu-  
344 mans and yeast. Conserved residues are highlighted in red. Alanine substitutions  
345 in MLH3 and MLH1 used in this study are in italics. Right, quantitation of assays  
346 as in Extended Data Fig. 1j, without or with ATP (0.5 mM), with either wild type  
347 hMLH1-hMLH3, L1-L3; hMLH1(E34A)-hMLH3, L1(EA)-L3; hMLH1-  
348 hMLH3(E28A), L1-L3(EA), or hMLH1(E34A)-hMLH3(E28A), L1(EA)-L3(EA). Av-  
349 erages shown; error bars, SEM; n=3.

350

351 **Figure 2. hMSH4-hMSH5 directly promotes the endonuclease activity of**  
352 **hMLH1-hMLH3.** **a**, Recombinant hMSH4-hMSH5 (S4-S5) used in this study. **b**,  
353 Quantitation of DNA binding assays such as shown in Extended Data Fig. 3a. Av-  
354 erages shown; error bars, SEM; n=3. **c**, Protein interaction assays with immobi-  
355 lized hMSH4-hMSH5 (bait) and hMLH1-hMLH3 (prey). Lanes 8 and 9 show re-  
356 combinant proteins loaded as controls. The 10% polyacrylamide gel was stained  
357 with silver. **d**, Nuclease assays with pFR-Rfa2 5.6 kbp-long scDNA and hMLH1-  
358 hMLH3 and hMSH4-hMSH5, as indicated. The assays were carried out at 30 °C in  
359 the presence of 5 mM manganese acetate and 0.5 mM ATP. A representative

360 experiment is shown at the bottom, a quantitation (averages shown; n=3; error  
361 bars, SEM) at the top. **e**, Nuclease assays with hMSH4-hMSH5 (S4-S5) and either  
362 wild type hMLH1-hMLH3 (L1-L3) or nuclease-dead hMLH1-hMLH3 (D1223N,  
363 Q1224K, E1229K) (L1-L3[3ND]). The assays were carried out at 30 °C in the pres-  
364 ence of 5 mM manganese acetate and 0.5 mM ATP. **f**, Quantitation of nuclease as-  
365 says with hMLH1-hMLH3 (L1-L3) and hMSH4-hMSH5 (S4-S5), as indicated, in the  
366 presence of various nucleotide co-factors or their analogs (2 mM). The assays  
367 were carried out at 30 °C in the presence of 5 mM manganese acetate. Averages  
368 shown; error bars, SEM; n≥4. **g**, Quantitation of nuclease assays as shown in Ex-  
369 tended Data Fig. 5d, with variants of hMLH1-hMLH3 (L1-L3), deficient in ATP hy-  
370 drolysis, without or with hMSH4-hMSH5 (S4-S5). See also Fig. 1g. Averages  
371 shown; error bars, SEM; n=3. The assays were carried out at 37 °C in the presence  
372 of 5 mM manganese acetate and 0.5 mM ATP. **h**, Top, alignment of MSH5 and  
373 MSH4 ATPase domains from humans and yeast. Conserved residues are high-  
374 lighted in red. Alanine substitutions in MSH5 and MSH4 used in this study are in  
375 italics. Bottom, quantitation of nuclease assays as shown in Extended Data Fig. 5e,  
376 with variants of hMSH4-hMSH5 (S4-S5), deficient in ATP hydrolysis, and hMLH1-  
377 hMLH3. Averages shown; error bars, SEM; n=3. The assays were carried out at 30  
378 °C in the presence of 5 mM manganese acetate and 0.5 mM ATP. **i**, Recombinant  
379 hMutSβ (hMSH2-hMSH3) used in this study. **j**, Recombinant hMutSα (hMSH2-  
380 hMSH6) used in this study. **k**, Nuclease assays with hMLH1-hMLH3, hMSH4-  
381 hMSH5 (S4-S5), and hMSH2-hMSH3 (S2-S3) or hMSH2-hMSH6 (S2-S6), as indi-  
382 cated. The assays were carried out at 30 °C in the presence of 5 mM manganese  
383 acetate and 0.5 mM ATP. A representative experiment is shown at the bottom, a  
384 quantitation (averages shown; n=3; error bars, SEM) at the top.

385

386 **Figure 3. hEXO1 promotes the nuclease activity of hMLH1-hMLH3 when in**  
387 **complex with hMSH4-hMSH5.** **a**, Recombinant hEXO1(D173A) used in this  
388 study. **b**, Nuclease assays with hMLH1-hMLH3 (L1-L3) and hMSH4-hMSH5 (S4-  
389 S5), as indicated, without (left) or with hEXO1(DA) (right). The assays were car-  
390 ried out at 30 °C in the presence of 5 mM manganese acetate and 0.5 mM ATP. A  
391 representative experiment is shown at the bottom, a quantitation (averages  
392 shown; n=3; error bars, SEM) at the top. **c**, Quantitation of kinetic nuclease assays

393 with hMLH1-hMLH3 and hMSH4-hMSH5, without or with hEXO1(DA). The assays  
394 were carried out at 30°C in the presence of 5 mM manganese acetate and 2 mM  
395 ATP. Averages shown; error bars, SEM; n=3. **d**, Nuclease assays with hMLH1-  
396 hMLH3, hMSH4-hMSH5 with either human hEXO1(D173A) or yeast  
397 yExo1(D173A), as indicated. The assays were carried out at 30 °C in the presence  
398 of 5 mM manganese acetate and 0.5 mM ATP. A representative experiment is  
399 shown at the bottom, a quantitation (averages shown; n=3; error bars, SEM) at  
400 the top. **e**, Protein interaction assays with immobilized hMLH1-hMLH3 (L1-L3,  
401 bait) and hEXO1 (E1, prey). Lane 3, recombinant hEXO1 was loaded as a control.  
402 The 10% polyacrylamide gel was stained with silver. **f**, Nuclease assays with  
403 hMLH1-hMLH3, hMSH2-hMSH3 (S2-S3) and hEXO1(DA), as indicated. The assays  
404 were carried out at 30 °C in the presence of 5 mM manganese acetate and 0.5 mM  
405 ATP. A representative experiment is shown at the bottom, a quantitation (aver-  
406 ages shown; n=3; error bars, SEM) at the top.

407

408 **Figure 4. RFC-PCNA promote DNA cleavage by the hMutLγ-hMutSγ-**  
409 **hEXO1(D173A) ensemble.** **a**, Nuclease assays with scDNA and indicated pro-  
410 teins (all 50 nM, except hPCNA, 100 nM) was carried out with 5 mM magnesium  
411 acetate and 2 mM ATP at 37 °C. A representative experiment is shown at the bot-  
412 tom, a quantitation (averages shown; n≥4; error bars, SEM) at the top. **b**, Repre-  
413 sentative nuclease assays carried out with 5 mM magnesium and/or manganese  
414 acetate, as indicated, with indicated recombinant proteins, containing 2 mM ATP  
415 and incubated at 37 °C. **c**, Nuclease reactions containing hMLH1-hMLH3 (L1-L3,  
416 50 nM); hMSH4-hMSH5 (S4-S5, 50 nM); hEXO1(D173A) (E1(DA), 50 nM) and  
417 yRFC-hPCNA (R-P, 50-100 nM, respectively) (column 1), without hMSH4-hMSH5  
418 (column 2) or without hEXO1(D173A) (column 3). Reactions were carried out  
419 with 5 mM magnesium acetate and 2 mM ATP at 37 °C. Averages shown; error  
420 bars, SEM; n≥4. **d**, Nuclease reactions with hMLH1-hMLH3 (L1-L3, 50 nM);  
421 hMSH4-hMSH5 (S4-S5, 50 nM); hEXO1(D173A) (E1(DA), 50 nM) and yRFC-  
422 hPCNA (R-P, 50-100 nM, respectively), as indicated. Reactions were carried out  
423 with 5 mM magnesium acetate and 2 mM ATP at 37 °C. Averages shown; error  
424 bars, SEM; n≥5. **e**, Protein interaction assays with immobilized hMLH1-hMLH3  
425 (bait) and hPCNA (prey). Lane 3, recombinant hPCNA was loaded as a control. The

426 10% polyacrylamide gel was stained with silver. **f**, Nuclease reactions as in panel  
427 a, lane 10, but either without ATP, with ATP or with AMP-PNP (2 mM). Averages  
428 shown; error bars, SEM; n=4. **g**, Nuclease reactions with hMLH1-hMLH3 (L1-L3,  
429 50 nM); hMSH4-hMSH5 (S4-S5, 50 nM); hEXO1(D173A), (E1(DA), 50 nM) and  
430 yRFC-hPCNA (R-P, 50-100 nM, respectively), lane 2. Lanes 3-7 contain instead  
431 hMLH1-hMLH3 or hMSH4-hMSH5 variants deficient in ATP hydrolysis, as indi-  
432 cated. See Extended Data Fig. 5d,e for specific mutations. Reactions were carried  
433 out with 5 mM magnesium acetate and 2 mM ATP at 37 °C. Averages shown; error  
434 bars, SEM; n=4. **h**, Representative nuclease reactions as in panel a, but with 3.5  
435 kbp-long dsDNA either containing (left) or not (right) DNA repeat forming HJ-like  
436 cruciform DNA. Averages shown; error bars, SEM; n=9.

437

438 **Figure 5. The stimulation of MLH3 nuclease ensemble requires a PIP box**  
439 **motif and is conserved in evolution.** **a**, Nuclease assays with hMLH1-hMLH3,  
440 L1-L3 (50 nM); hMSH4-hMSH5, S4-S5 (50 nM); hEXO1(DA), E1(DA) (50 nM) and  
441 yRFC-hPCNA, R-P (50-100nM), as indicated, with 5 mM magnesium acetate and 2  
442 mM ATP at 37 °C. The reactions were supplemented with a p21<sup>22</sup> PIP-box wild  
443 type or mutated control peptide, where indicated (670 nM, ~5-fold over  $K_d$  of wild  
444 type peptide for PCNA). Averages shown; error bars, SEM; n=4. **b**, Top, alignment  
445 of PIP-box like motifs from various human or yeast (*S. cerevisiae*) proteins. Resi-  
446 dues more likely to be conserved are highlighted in red. Wild type human and  
447 yeast EXO1, MLH3/Mlh3 and MLH1/Mlh1 were mutated to create respective (P)  
448 variants with indicated residue substitutions (A). Bottom, nuclease assays with  
449 hMLH1-hMLH3, L1-L3 (50 nM); hMSH4-hMSH5, S4-S5 (50 nM); hEXO1(DA),  
450 E1(DA) (50 nM) and yRFC-hPCNA, R-P (50-100nM), as indicated, with 5 mM mag-  
451 nesium acetate and 2 mM ATP at 37 °C. Where indicated, wild type hMLH1 was  
452 replaced with MLH1<sup>P</sup> (Q562A, I565A, F568A), wild type hMLH3 with hMLH3<sup>P</sup>  
453 (Q341A, V344A, F347A), and E1(DA), hEXO1(D173A), with E1(DA)<sup>P</sup>, hEXO1  
454 (D173A, Q788A, L791A). Averages shown; error bars, SEM, n=5. **c**, Recombination  
455 frequency, expressed as a map distance in centimorgans, was assayed in the wild  
456 type strain, *mlh1*Δ and *mlh3*Δ, and in strains complemented with a construct ex-  
457 pressing wild type Mlh1, Mlh1<sup>P</sup> (Q572A-L575A-F578A) or Mlh3<sup>P</sup> (Q293A-V296A-  
458 F300A). Averages shown; error bars, SD; n≥900 from 3 biological replicates for

459 each genotype. **d**, Frequency of chromosome VIII non-disjunction in strains as de-  
460 scribed in panel c. Averages shown; error bars, SD;  $n \geq 900$  from 3 biological rep-  
461 licates for each genotype. **e**, A pulldown of TAP-tagged yRfc1-5 and associated pro-  
462 teins from meiotic cell extracts from *pCUP1-IME1* cells 5 h 30 min after the induc-  
463 tion of meiosis. The presence of Mlh1-HA and Mlh3-Myc in the TEV eluate was  
464 analyzed by Western blotting. **f**, Rfc1-TAP levels at the indicated meiotic DSB  
465 hotspots relative to a negative control site (*NFT1*) were assessed by ChIP and  
466 qPCR during a meiotic time-course (synchronized *pCUP1-IME1* cells). Averages  
467 shown; error bars, SD;  $n=2$ . The cartoon illustrates the position of sites analyzed  
468 by qPCR relative to the meiotic chromosome structure.

469

470

471



472 **Methods**

473

474 **Preparation of expression vectors**

475 To prepare the hMSH4-hMSH5 expression vector, the hMSH4-STREP and hMSH5-  
476 8xHIS constructs were codon-optimized for expression in *Spodoptera frugiperda*  
477 Sf9 cells and synthesized (GenScript). The genes were amplified by PCR using M13  
478 forward and reverse primers (see Extended Data Table 1 for sequences of all oli-  
479 gonucleotides) and digested with *SalI* and *HindIII* (for hMSH4) or *SmaI* and *KpnI*  
480 (for hMSH5) restriction endonucleases (New England Biolabs). Digested frag-  
481 ments were ligated into corresponding sites in pFBDM (Addgene) to obtain  
482 pFBDM-hMSH4co-STREP and pFBDM-hMSH5co-HIS, respectively. Both plasmids  
483 were then digested with *BamHI* and *HindIII* (New England Biolabs) and ligated to  
484 generate pFBDM-hMSH4co-STREP-hMSH5co-HIS. To prepare expression con-  
485 structs coding for the ATPase variants of hMSH4 and hMSH5, the respective con-  
486 served residues in the Walker A motifs (see ref<sup>23</sup>) were mutated by QuikChange  
487 II site-directed mutagenesis kit (Agilent Technologies). To prepare MSH4G685A,  
488 the pFB-hMSH4co-STREP-hMSH5co-HIS vector was mutated with primers  
489 HMSH4G685A\_FO and HMSH4G685A\_RE. This created pFB-hMSH4coG685A-  
490 STREP-hMSH5co-HIS. To prepare MSH5G597A, HMSH5G597A\_FO and  
491 HMSH5G597A\_RE primers were used to create pFB-hMSH4co-STREP-  
492 hMSH5coG597A-HIS. We also prepared a construct combining both mutations,  
493 but the resulting mutant complex was not stable and could not be purified.

494 To prepare the hMLH1 and hMLH3 expression vectors, both genes were ampli-  
495 fied by PCR from pFL-his-MLH3co-MLH1co containing both *hMLH1* and *hMLH3*  
496 genes, which were codon-optimized for insect cell expression. To amplify *hMLH1*,  
497 FLAG-hMLH1co\_FO and hMLH1co\_RE primers were used. The PCR product was  
498 digested with *NheI* and *XbaI* (New England Biolabs) and inserted in pFB-MBP-  
499 MLH3-his<sup>18</sup> creating pFB-FLAG-hMLH1co (the sequence of *hMLH3* was removed  
500 during this step). Similarly, hMLH3 was amplified using MLH3co\_FO and  
501 MLH3co\_RE. The PCR product was digested with *NheI* and *XmaI* (New England  
502 Biolabs) and inserted into pFB-MBP-MLH3-HIS, generating pFB-MBP-hMLH3co.  
503 The sequence of non-optimized *hMLH3* was removed during this step. The con-  
504 sensus metal-binding motif in hMLH3 is DQHAADE (conserved residues

505 underlined)<sup>2,20</sup>. To prepare the nuclease-dead variant, the sequence of wild type  
506 *hMLH3* in pFB-MBP-MLH3co-HIS was mutated using primers HMLH33ND\_FO and  
507 HMLH33ND\_RE. This created a sequence with 3 point mutations including  
508 D1223N, Q1224K and E1229K (*NKHAADK*, mutated residues in italics), and the  
509 resulting vector was pFB-MBP-MLH3co3ND-HIS. We note that a single point mu-  
510 tant hMLH1-hMLH3(D1223N) retained ~10% activity in reactions with manga-  
511 nese (Extended Data Fig. 1e), and was therefore not further used in this work. To  
512 disrupt the ATPase of hMLH1<sup>21</sup>, the pFB-FLAG-hMLH1co was mutated using pri-  
513 mers HMLH1E34A\_FO and HMLH1E34A\_RE. This created pFB-FLAG-MLH1E34A.  
514 To mutate the corresponding conserved residue in hMLH3, the pFB-HIS-MBP-  
515 MLH3co was mutated using primers HMLH3E28A\_FO and HMLH3E28A\_RE. This  
516 created pFB-HIS-MBP-MLH3E28A. To prepare the hMLH1<sup>P</sup> variant, the pFB-  
517 FLAG-hMLH1co plasmid was mutated using HMLH1\_PIP1\_3AFO and  
518 HMLH1\_PIP1\_3ARE primers. To prepare the hMLH3<sup>P</sup> variant, the pFB-FLAG-  
519 hMLH3co plasmid was mutated using HMLH3\_PIP\_3AFO and HMLH3\_PIP\_3ARE  
520 primers.

521 To prepare pFB-hEXO1-FLAG, the sequence coding for wild type hEXO1 (or  
522 hEXO1[DA], containing the D173A mutation inactivating its nuclease) was ampli-  
523 fied by PCR using primers HEXO1\_FO and HEXO1\_RE, and respective vectors (a  
524 kind gift from Stefano Ferrari, University of Zurich)<sup>44</sup> as templates. The PCR prod-  
525 ucts were digested by *Bam*HI and *Xma*I (New England Biolabs), and cloned into  
526 corresponding sites in pFB-MBP-Sae2-HIS<sup>45</sup> (the sequence of MBP-Sae2 was re-  
527 moved during the process, FLAG-tag was added to the C-terminus and a HIS-tag  
528 from the original construct was not translated due to a Stop codon). The

529 To prepare pFB-hMSH2-FLAG, the sequence coding for hMSH2 was amplified  
530 from pFB-hMSH2<sup>46</sup> using primers HMSH2FLAG\_FO and HMSH2FLAG\_RE. The  
531 PCR product was digested by *Bam*HI and *Xho*I (New England Biolabs), and cloned  
532 into corresponding sites in pFB-MBP-Sae2 (the sequence of MBP-Sae2 was re-  
533 moved during the process, FLAG-tag was added to the C-terminus of hMSH2 and  
534 a HIS-tag from the original construct was not translated due to a Stop codon).

535 To prepare pFB-HIS-yMLH1, pFB-GST-yMLH1<sup>18</sup> was digested using *Bam*HI  
536 (New England Biolabs) to remove the GST tag. This procedure left behind a single  
537 *Bam*HI site. Two complementary oligonucleotides His-For and His-Rev were

538 annealed to each other, and cloned into the *Bam*HI site. This introduced a se-  
539 quence coding for 8xHIS tag before the yeast *MLH1* gene creating pFB-HIS-  
540 yMLH1.

541 To prepare pFB-MBP-yMLH3, a termination codon was introduced after the  
542 yMLH3 gene in pFB-MBP-yMLH3-HIS<sup>18</sup> so that the HIS-tag would not be trans-  
543 lated with the yMlh3 protein. This was carried out by site-directed mutagenesis  
544 using forward primer 329 and reverse primer 330.

545 To prepare the expression vector for yMsh4, the yeast *MSH4* gene was ampli-  
546 fied from the genomic DNA of the *S. cerevisiae* SK1 strain using forward primer  
547 258 and reverse primer 259b. The reverse primer introduced the sequence for  
548 the C-terminal STREP affinity tag. The amplified product was digested with  
549 *Bam*HI and *Hind*III (New England Biolabs) and cloned into corresponding sites of  
550 pFB-GST-MLH1<sup>18</sup> to create pFB-yMSH4-STREP. The yeast *MSH5* gene was ampli-  
551 fied from the genomic DNA of the *S. cerevisiae* W303 strain using forward primer  
552 265 and reverse primer 266. The *MSH5* gene was then cloned into *Bam*HI and  
553 *Xho*I restriction sites of pFB-MBP-MLH3-HIS<sup>18</sup> to create pFB-yMSH5-HIS.

554

### 555 **Purification of hMLH1-hMLH3**

556 The bacmids and baculoviruses were prepared individually using pFB-FLAG-  
557 hMLH1co and pFB-HIS-MBP-hMLH3co vectors according to manufacturer's in-  
558 structions (Bac-to-Bac system, Life Technologies). *Spodoptera frugiperda* 9 (*Sf*9)  
559 cells were seeded at 500,000 cells per ml 16 h before infection. The cells were  
560 then co-infected with both baculoviruses and incubated for 52 h at 27 °C with  
561 constant agitation. The cells were then harvested (500 x g, 10 min) and washed  
562 once with PBS (137 mM NaCl, 2.7 mM KCl, 10 mM Na<sub>2</sub>HPO<sub>4</sub>, 1.8 mM KH<sub>2</sub>PO<sub>4</sub>). The  
563 pellets were snap-frozen in liquid nitrogen and stored at -80 °C. All subsequent  
564 steps were carried out on ice or at 4 °C. The pellets were resuspended in 3 vol-  
565 umes of lysis buffer [50 mM Tris-HCl pH 7.5, 1 mM dithiothreitol (DTT), 1 mM  
566 ethylenediaminetetraacetic acid (EDTA), 1 mM phenylmethylsulfonyl fluoride  
567 (PMSF), 1:400 (volume/volume) protease inhibitor cocktail (Sigma, P8340), 30  
568 µg/ml leupeptin (Merck)] and incubated for 20 min with continuous stirring.  
569 Next, 1/2 volume of 50% glycerol was added, followed by 6.5% volume of 5 M  
570 NaCl (final concentration 305 mM). The suspension was further incubated for 30

571 min with continuous stirring. The cell suspension was centrifuged for 30 min at  
572 48,000 x g to obtain soluble extract. The supernatant was transferred to tubes  
573 containing pre-equilibrated Amylose resin (New England Biolabs, 4 ml per 1l of  
574 *Sf9* culture) and incubated for 1 h with continuous agitation. The resin was col-  
575 lected by spinning at 2,000 x g for 2 min and washed extensively batchwise and  
576 on a disposable column (10 ml, Thermo Fisher) with Amylose wash buffer [50  
577 mM Tris-HCl pH 7.5, 1 mM  $\beta$ -mercaptoethanol ( $\beta$ -ME), 1 mM PMSF, 10% glycerol,  
578 300 mM NaCl]. Protein was eluted with Amylose elution buffer [50 mM Tris-HCl  
579 pH 7.5, 0.5  $\beta$ -ME, 1 mM PMSF, 10% glycerol, 300 mM NaCl, 10 mM maltose  
580 (Sigma)] and the total protein concentration was estimated by Bradford assay. To  
581 cleave off the maltose binding tag (MBP), 1/6 (weight/weight) of PreScission pro-  
582 tease (PP)<sup>47</sup>, with respect to total protein concentration in the eluate, was added  
583 and incubated for 1 h. Next, the cleaved amylose eluate was diluted by adding 1/2  
584 volume of FLAG dilution buffer (50 mM Tris-HCl pH 7.5, 1 mM PMSF, 10% glyc-  
585 erol, 300 mM NaCl) to lower the concentration of  $\beta$ -ME. The diluted eluate was  
586 then incubated batchwise for 1 h with pre-equilibrated anti-FLAG M2 affinity  
587 resin (Sigma, A2220, 0.8 ml). The resin was washed extensively with FLAG wash  
588 buffer (50 mM Tris-HCl pH 7.5, 0.5 mM  $\beta$ -ME, 1 mM PMSF, 10% glycerol, 150 mM  
589 NaCl). Protein was eluted with FLAG wash buffer containing 150 ng/ $\mu$ l 3x FLAG  
590 peptide (Sigma), aliquoted, frozen in liquid nitrogen and stored at -80 °C. The final  
591 construct contained a FLAG tag at the N-terminus of hMLH1. The yield from 1 l  
592 culture was ~0.5 mg and the concentration ~2  $\mu$ M. All hMLH1-hMLH3 mutants  
593 were expressed and purified using the same procedure.

594

#### 595 **Purification of hMSH4-hMSH5**

596 The human hMSH4-hMSH5 complex was expressed from a dual pFB-hMSH4co-  
597 STREP-hMSH5co-HIS vector in *Sf9* cells using the Bac-to-Bac system as described  
598 above. All purification steps were carried out on ice or at 4 °C. The cell pellets  
599 were resuspended in 3 volumes of nickel-nitriloacetic acid (NiNTA) lysis buffer  
600 [50 mM Tris-HCl pH 7.5, 2 mM  $\beta$ -ME, 1 mM EDTA, 1 mM PMSF, 1:400 (vol-  
601 ume/volume) protease inhibitor cocktail (Sigma, P8340), 30  $\mu$ g/ml leupeptin  
602 (Merck), 20 mM imidazole] and incubated for 20 min with continuous stirring.  
603 Next 1/2 volume of 50% glycerol was added, followed by 6.5% volume of 5 M

604 NaCl (final concentration 305 mM), and the suspension was further incubated for  
605 30 min with continuous stirring. To obtain soluble extract, the suspension was  
606 centrifuged at 48,000 x g for 30 min. The soluble extract was transferred to a tube  
607 containing pre-equilibrated NiNTA resin (Qiagen, 4 ml per 1 l *Sf9* cells) and incu-  
608 bated for 1 h with continuous mixing. The NiNTA resin was collected by centrifu-  
609 gation at 2,000 x g for 2 min. The resin was washed extensively batchwise and on  
610 a disposable column with NiNTA wash buffer (50 mM Tris-HCl pH 7.5, 2 mM  $\beta$ -  
611 ME, 300 mM NaCl, 1 mM PMSF, 10% glycerol, 20 mM imidazole). Protein was  
612 eluted with NiNTA wash buffer containing 250 mM imidazole. The eluted sample  
613 was incubated with pre-equilibrated Strep-Tactin Superflow resin (Qiagen, 0.7  
614 ml) for 90 min with continuous mixing. The resin was transferred to a disposable  
615 column and washed extensively with Strep wash buffer (50 mM Tris-HCl pH 7.5,  
616 2 mM  $\beta$ -ME, 300 mM NaCl, 1 mM PMSF, 10% glycerol). Protein was eluted with  
617 Strep wash buffer containing 2.5 mM d-Desthiobiotin (Sigma) and stored at -80  
618 °C after snap freezing in liquid nitrogen. The final construct contained a STREP  
619 tag at the C-terminus of hMSH4 and a HIS-tag at the C-terminus of hMSH5. The  
620 variants of the hMSH4-hMSH5 complex were purified using the same procedure.  
621 We note that the double mutant hMSH4G685A-hMSH5G597A heterodimer was  
622 not stable and could not be purified.

623

#### 624 **Purification of hEXO1(D173A)**

625 The pFB-EXO1(DA)-FLAG vector was used to prepare recombinant baculovirus  
626 and the protein was expressed in *Sf9* cells as described above. Frozen cell pellet  
627 was thawed and resuspended in 3 pellet volumes of lysis buffer [50 mM Tris-HCl  
628 pH 7.5, 0.5 mM  $\beta$ -ME, 1 mM EDTA, 1:400 (volume/volume) protease inhibitor  
629 cocktail (Sigma, P8340), 0.5 mM PMSF, 20  $\mu$ g/ml leupeptin]. The cell suspension  
630 was incubated with gentle stirring for 10 min. 1/2 volume of 50% glycerol and  
631 6.5% volume of 5 M NaCl (final concentration 305 mM) were added. The suspen-  
632 sion was incubated for 30 min with stirring. The extract was then centrifuged at  
633 48,000 x g for 30 min. The soluble extract was added to pre-equilibrated M2 anti  
634 FLAG affinity resin (Sigma, A2220, 2 ml resin for purification from 1 l *Sf9* cell cul-  
635 ture) and incubated batchwise for 45 min. The suspension was then centrifuged  
636 (2,000 x g, 5 min), the supernatant (FLAG flowthrough) removed, and the resin

637 was transferred to a disposable chromatography column. The resin was washed  
638 with 50 resin volumes of TBS buffer (20 mM Tris-HCl pH 7.5, 150 mM NaCl, 0.5  
639 mM  $\beta$ -ME, 0.5 mM PMSF, 10% glycerol) supplemented with 0.1% NP40. This was  
640 followed by washing with 10 resin volumes of TBS buffer without NP40. EXO1-  
641 FLAG was eluted with TBS buffer supplemented with 150 ng/ $\mu$ l 3x FLAG peptide  
642 (Sigma, F4799). Fractions containing detectable protein (as estimated by the  
643 Bradford method) were pooled, applied on a disposable column with 1 ml pre-  
644 equilibrated Biorex70 resin (Bio-Rad), and flow-through was collected. The sam-  
645 ple was then diluted by adding 1 volume of dilution buffer (50 mM Tris-HCl pH  
646 7.5, 5 mM  $\beta$ -ME, 0.5 mM PMSF, 10% glycerol). Diluted FLAG-EXO1 was applied on  
647 1 ml HiTrap SP HP column (GE Healthcare) pre-equilibrated with S buffer A (50  
648 mM Tris-HCl pH 7.5, 75 mM NaCl, 5 mM  $\beta$ -ME, 10% glycerol) at 0.8 ml/min. The  
649 column was washed with 20 ml S buffer A, and eluted with 8 ml linear salt gradi-  
650 ent in S buffer A (75 mM to 1 M NaCl). Peak fractions were pooled, aliquoted, fro-  
651 zen in liquid nitrogen and stored at -80 °C. The procedure yielded around ~0.15  
652 mg of protein from 1 l of *Sf9* culture, with an approximate concentration of ~1  $\mu$ M.  
653

#### 654 **Purification of hMSH2-hMSH6 and hMSH2-hMSH3 heterodimers**

655 To prepare the hMSH2-hMSH6 heterodimer, the *Sf9* cells were co-infected with  
656 recombinant baculoviruses prepared from pFB-hMSH2-FLAG and pFB-hMSH6-  
657 HIS<sup>46</sup> vectors. The purification was carried out at 4 °C or on ice. The cell pellets  
658 were resuspended in 3 volumes of lysis buffer [50 mM Tris-HCl pH 7.5, 1:400 [vol-  
659 ume/volume] protease inhibitor cocktail (Sigma, P8340), 1 mM PMSF, 60  $\mu$ g/ml  
660 leupeptin and 0.5 mM  $\beta$ -ME]. The sample was incubated while stirring for 20 min.  
661 1/2 volume of 50% glycerol was added, followed by 6.5% volume 5 M NaCl (final  
662 concentration 305 mM). The cell suspension was incubated for 30 min with stir-  
663 ring. To obtain soluble extract, the suspension was centrifuged (30 min, 48,000 x  
664 g). The supernatant was mixed with pre-equilibrated 2 ml NiNTA resin (purifica-  
665 tion from 800 ml *Sf9* cells) and incubated batchwise for 1 h. The resin was then  
666 washed batchwise and on column with wash buffer [30 mM Tris-HCl pH 7.5,  
667 1:1,000 (volume/volume) protease inhibitor cocktail (Sigma, P8340), 15  $\mu$ g/ml  
668 leupeptin, 0.5 mM  $\beta$ -ME, 0.5 mM PMSF, 20 mM imidazole, 300 mM NaCl, 10%

669 glycerol]. Bound protein was eluted with elution buffer [30 mM Tris-HCl pH 7.5,  
670 1:1,000 (volume/volume) protease inhibitor cocktail (Sigma, P8340), 15 µg/ml  
671 leupeptin, 0.5 mM β-ME, 0.5 mM PMSF, 300 mM imidazole, 150 mM NaCl, 10%  
672 glycerol]. The pooled fractions were diluted with 7 volumes of dilution buffer (30  
673 mM Tris-HCl pH 7.5, 15 µg/ml leupeptin, 0.5 mM β-ME, 0.5 mM PMSF, 150 mM  
674 NaCl, 10% glycerol), and mixed with 0.7 ml pre-equilibrated anti-FLAG M2 affinity  
675 gel (Sigma). The suspension was incubated batchwise for 60 min. The sample was  
676 centrifuged (5 min, 1,000 g) and resin was transferred to a disposable chroma-  
677 tography column. The resin was then washed extensively with dilution buffer. The  
678 heterodimer was eluted with dilution buffer supplemented with 200 µg/ml 3x  
679 FLAG peptide (Sigma). Eluates containing protein were pooled, aliquoted, frozen  
680 in liquid nitrogen and stored at -80 °C. The hMSH2-hMSH3 heterodimer was pre-  
681 pared using the same procedure, using pFB-hMSH3-HIS<sup>48</sup>.

682

### 683 **Purification of yMsh4-yMsh5**

684 Baculoviruses expressing yMsh4 and yMsh5 were prepared individually using the  
685 Bac-to-Bac system and pFB-yMSH4-STREP and pFB-yMSH5-HIS vectors. *Sf9* cells  
686 were co-infected with optimized ratios of both viruses to express both proteins  
687 together as a heterodimer. The cells were harvested 52 h after infection, washed  
688 with PBS, and the pellets were frozen in liquid nitrogen and stored at -80 °C until  
689 use. The subsequent steps were carried out on ice or at 4 °C. The cell pellet was  
690 resuspended in lysis buffer [50 mM Tris-HCl pH 7.5, 2 mM β-ME, 1 mM EDTA,  
691 1:400 (volume/volume) protease inhibitor cocktail (Sigma, P8340), 1 mM PMSF,  
692 30 µg/ml leupeptin, 20 mM imidazole]] for 20 min. Then, 50% glycerol was added  
693 to a final concentration of 16%, followed by 5 M NaCl to a final concentration of  
694 305 mM. The suspension was incubated for further 30 min with gentle agitation.  
695 The total cell extract was centrifuged at 48,000 x g for 30 min to obtain soluble  
696 extract. The extract was then bound to NiNTA resin (Qiagen) for 60 min batchwise  
697 followed by extensive washing with NiNTA wash buffer (50 mM Tris-HCl pH 7.5,  
698 2 mM β-ME, 300 mM NaCl, 10 % glycerol, 1 mM PMSF, 10 µg/ml leupeptin, 20 mM  
699 imidazole) both batchwise and on a column. The heterodimer was eluted by  
700 NiNTA elution buffer (NiNTA wash buffer containing 250 mM imidazole). The elu-  
701 ate was further incubated with pre-equilibrated Strep-Tactin Superflow resin

702 (Qiagen) for 60 min batchwise. The protein-bound resin was then washed in two  
703 sequential steps; first with STREP wash buffer I (50 mM Tris pH 7.5, 2 mM  $\beta$ -ME,  
704 10 % glycerol, 1 mM PMSF and 300 mM NaCl) and then with STREP wash buffer  
705 II (50 mM Tris pH 7.5, 2 mM  $\beta$ -ME, 10 % glycerol, 1 mM PMSF and 50 mM NaCl).  
706 The heterodimer was eluted with STREP wash buffer II containing 2.5 mM d-Des-  
707 thiobiotin (Sigma). The eluate was then applied on a pre-equilibrated HiTrap Q  
708 HP column (GE Healthcare). The column was washed with STREP wash buffer II  
709 and protein was eluted with a linear gradient of NaCl (50 to 600 mM) in STREP  
710 wash buffer II. Collected fractions were analyzed on SDS-PAGE, peak samples  
711 were pooled, aliquoted and stored at -80 °C. The final construct contained a  
712 STREP tag at the C-terminus of yMsh4 and a HIS-tag at the C-terminus of yMsh5.  
713 The procedure yielded ~ 0.15 mg of protein from 4 l of *Sf9* culture, with an ap-  
714 proximate concentration of ~ 1  $\mu$ M.

715

#### 716 **Purification of yMlh1-yMlh3**

717 The yMlh1-yMlh3 heterodimer was expressed using pFB-HIS-yMLH1 and pFB-  
718 MBP-yMLH3 and the Bac-to-Bac system and purified using affinity chromatog-  
719 raphy<sup>18</sup>. Briefly, the cells were resuspended in lysis buffer containing 50 mM Tris-  
720 HCl pH 7.5, 1 mM DTT, 1 mM EDTA, 1:400 (volume/volume), protease inhibitor  
721 cocktail (Sigma, P8340), 1 mM PMSF, 30  $\mu$ g/ml leupeptin and incubated for 20  
722 min. Subsequently glycerol [final concentration 16% (volume/volume)] and NaCl  
723 (final concentration 305 mM) were added. Upon further incubation for 30 min  
724 and centrifugation (48,000 x g, 30 min), the cleared extract was then subjected to  
725 affinity chromatography with Amylose resin (New England Biolabs), the MBP tag  
726 was cleaved with PreScission protease and the heterodimer was further purified  
727 on Ni-NTA agarose (Qiagen)<sup>18</sup>. The final eluate was dialyzed into 50 mM Tris-HCl  
728 pH 7.5, 5 mM  $\beta$ -ME, 10% glycerol, 0.5 mM PMSF and 300 mM NaCl. Aliquots were  
729 flash frozen and stored at -80 °C until use. The purification yielded ~ 1 mg protein  
730 from 2.4 l culture and the concentration was 5.9  $\mu$ M.

731

#### 732 **Purification of RFC, PCNA and the Ku heterodimer**



733 Human PCNA was expressed in *E. coli* cells (1 l) from pET23C-his-hPCNA vector  
734 (a kind gift from Ulrich Huebscher, University of Zurich). Transformed cells  
735 were grown to OD 0.5, and induced with 0.5 mM isopropyl  $\beta$ -D-1-thiogalactopy-  
736 ranoside (IPTG) for 3.5 h at 37 °C. Cells were lysed by sonication in lysis buffer  
737 (20 mM Tris-HCl pH 7.5, 250 mM NaCl, 2 mM  $\beta$ -ME, 5 mM imidazole, 1 mM  
738 PMSF, 1:250 Sigma protease inhibitor cocktail P8340). The lysate was cleared by  
739 centrifugation (48,000 x g, 30 min) and bound to 2 ml NiNTA resin (Qiagen) for  
740 1 h batchwise. Resin was washed with wash buffer (20 mM Tris-HCl pH 7.5, 250  
741 mM NaCl, 2 mM  $\beta$ -ME, 30 mM imidazole, 1 mM PMSF), and PCNA was eluted  
742 with elution buffer (wash buffer supplemented with 400 mM imidazole). The  
743 sample was diluted to conductivity corresponding to 100 mM NaCl, and loaded  
744 on HiTrapQ column. The column was developed by a salt gradient (100 mM to 1  
745 M NaCl) in 20 mM Tris-HCl pH 7.5, 2 mM  $\beta$ -ME and 10% glycerol. The fractions  
746 containing PCNA were pooled, aliquoted and stored at -80°C.

747 Yeast RFC was expressed in *E. coli* cells (4 l) transformed with pEAO271 (a kind  
748 gift from E. Alani, Cornell university). Cells were grown to OD 0.5, and induced  
749 with 0.5 mM isopropyl  $\beta$ -D-1-thiogalactopyranoside (IPTG) for 3 h at 37 °C. Cells  
750 were resuspended in lysis buffer (60 mM HEPES-NaOH pH 7.5, 250 mM NaCl, 2  
751 mM  $\beta$ -ME, 0.5 mM EDTA, 1:250 Sigma protease inhibitor cocktail P8340, 1 mM  
752 PMSF, 10% glycerol) and disrupted by sonication. The cleared extract was loaded  
753 on 5 ml SP sepharose column, washed with buffer SP A (30 mM HEPES-NaOH pH  
754 7.5, 300 mM NaCl, 2 mM  $\beta$ -ME, 0.5 mM EDTA, 1 mM PMSF, 10% glycerol) and  
755 eluted with a salt gradient (300 mM to 600 mM NaCl). Eluted fractions were ana-  
756 lyzed by polyacrylamide gel electrophoresis, pooled and diluted to conductivity  
757 corresponding to 110 mM NaCl. The diluted sample was applied on HiTrapQ col-  
758 umn, and eluted in 110 to 600 mM NaCl gradient in 30 mM HEPES-NaOH pH 7.5,  
759 2 mM  $\beta$ -ME, 1 mM PMSF and 10% glycerol. The eluate was aliquoted and stored  
760 at -80 °C. The preparation of the yeast Ku heterodimer was described previ-  
761 ously<sup>49</sup>.

762

763 **Nuclease assays**

764 The reactions (15  $\mu$ l) were carried out in 25 mM Tris-acetate pH 7.5, 1 mM DTT,  
765 0.1 mg/ml bovine serum albumin (BSA, New England Biolabs), and as indicated  
766 manganese or magnesium acetate (5 mM), ATP (concentrations as indicated, GE  
767 Healthcare, 27-1006-01) and plasmid-based DNA substrate [100 ng per reaction,  
768 either 2.7 kbp-long pUC19 (Fig. 1), 5.6 kbp-long pFB-Rfa2 (Fig. 2-5), pAG25  
769 (Addgene) or cruciform pIRbke8 mut<sup>36</sup>], where unlabeled DNA was used, or 1 nM,  
770 in molecules, where <sup>32</sup>P-labeled substrate or detection method was used). Where  
771 indicated, ADP (Alfa Aesar, J60672), AMP-PNP (Sigma, A2647) or ATP- $\gamma$ -S (Cay-  
772 man, 14957) were used instead of ATP. Where indicated, the reactions were sup-  
773 plemented with PIP box peptide derived from p21  
774 (GRKRRQTSMTDFYHSKRRLIFS) or control peptide with key residues mutated  
775 (underlined, GRKRRATSATDFYHSKRRLIFS). The reaction buffer was assembled  
776 on ice, and the recombinant proteins were then added on ice (hMLH1-hMLH3 pro-  
777 tein was always added last). The reactions, unless indicated otherwise, were in-  
778 cubated for 60 min at 30 °C or 37 °C. The reactions were supplemented with pro-  
779 tein storage or dilution buffer to compensate for components introduced with re-  
780 combinant proteins in each particular experiment, this resulted in final NaCl con-  
781 centrations ~30 mM. The reactions were terminated with 5  $\mu$ l STOP solution (150  
782 mM EDTA, 2% SDS, 30% glycerol, 0.01% bromophenol blue), 1  $\mu$ l proteinase K  
783 (Roche, 03115828001, 18 mg/ml) and further incubated for 60 min at 50 °C. The  
784 reaction products were then separated by electrophoresis in 1% agarose (Sigma,  
785 A9539) containing GelRed (Biotium) in TAE buffer. Using Bio-Rad SubCell GT sys-  
786 tem (gel length 26 cm), the separation was carried out for 90 min at 120 V. The  
787 gels were then imaged (InGenius3, GeneSys). The results were quantitated using  
788 ImageJ and expressed as % of nicked DNA versus the total DNA in each particular  
789 lane; any nicked DNA present in control (no protein) reactions was removed as a  
790 background.

791

### 792 **Electrophoretic mobility shift assays**

793 The DNA binding reactions were carried out in 15  $\mu$ l volume in binding buffer  
794 containing 25 mM HEPES pH 7.8, 5 mM magnesium chloride, 5% (volume/vol-  
795 ume) glycerol, 1 mM DTT, 50  $\mu$ g/ml BSA, 6.6 ng/ $\mu$ l dsDNA (competitor, 50 bp-  
796 long, 100-fold molar excess over labeled DNA), 0.5 nM DNA substrate (<sup>32</sup>P-

797 labelled, in molecules) and respective concentrations of recombinant proteins  
798 (yeast or human MSH4-MSH5 complex and their variants, hMLH1-hMLH3 and  
799 variants, hEXO1). The oligonucleotide-based DNA substrates were ssDNA (la-  
800 belled oligonucleotide PC1253), dsDNA (labelled PC1253 and PC1253C), Y-struc-  
801 ture (labelled PC1254 and PC1253), HJ (labelled PC1253 and PC1254, PC1255  
802 and PC1256) and D-Loop (labelled BB, and BT, INVa and INVb). MgCl<sub>2</sub> was re-  
803 placed by 3 mM EDTA where indicated. The reactions were assembled and incu-  
804 bated on ice for 15 min, followed by the addition of 5 µl EMSA loading dye (50%  
805 glycerol, 0.01% bromophenol blue). The products were separated on 6% native  
806 polyacrylamide gel (19:1 acrylamide-bisacrylamide, BioRad) on ice. The gels  
807 were dried on 17 CHR paper (Whatman), exposed to storage phosphor screens  
808 (GE Healthcare), and scanned by Phosphorimager (Typhoon FLA 9500, GE  
809 Healthcare). The quantitation was carried out by ImageQuant software (GE  
810 Healthcare) and graphs were plotted using Prism software (Prism 8, Graphpad).  
811 For the "super-shift" assays comprising yMlh1-yMlh3 and yMsh4-yMsh5, the re-  
812 actions were carried out as mentioned above (with magnesium or EDTA, as indi-  
813 cated), except that the products were separated on 0.6% agarose gel in TAE buffer  
814 at 4 °C (1 h, 100 V). The gels were dried on DE81 paper (Whatman) and scanned  
815 as above. In the super-shift assays with hMLH1-hMLH3, hMSH4-hMSH5 and  
816 hEXO1, the reaction buffer additionally contained 75 mM NaCl and 10 µM ATP.  
817 The DNA binding assays with yKu70-80 were carried out similarly, without salt  
818 and ATP, and were incubated for 30 min at 30 °C.

819

## 820 **Protein interaction assays**

821 To test for protein-protein interactions, recombinant "bait" protein was immobi-  
822 lized on beads coupled to a specific antibody and incubated with the "prey" pro-  
823 tein. After removal of unbound protein by beads washing, proteins were either  
824 detected by silver staining or by western blot.

825 To test for the interaction between hMLH1-hMLH3 and hMSH4-hMSH5, 0.7 µg  
826 anti-MLH1 antibody (Abcam, ab92312) was captured on 15 µl Protein G magnetic  
827 beads (Dynabeads, Invitrogen) by incubating in 50 µl PBS-T (PBS with 0.02%  
828 Tween-20) for 60 min with gentle mixing at regular intervals. The beads were  
829 washed 3 times on magnetic racks with 150 µl PBS-T to remove unbound

830 antibodies. The beads were then mixed with 165 nM recombinant hMLH1-hMLH3  
831 and 220 nM hMSH4-hMSH5 in 50  $\mu$ l binding buffer I (25 mM HEPES pH 7.8, 3 mM  
832 EDTA, 1 mM DTT, 50  $\mu$ g/ml BSA, 54 mM NaCl) and incubated on ice for 45 min  
833 with gentle agitation at regular intervals. Beads were then washed 3 times with  
834 150  $\mu$ l wash buffer I (25 mM HEPES pH 7.8, 3 mM EDTA, 1 mM DTT, 0.02% Tween-  
835 20) and proteins were eluted by boiling the beads in SDS buffer (50 mM Tris-HCl  
836 pH 6.8, 1.6% sodium dodecyl sulphate, 100 mM DTT, 10% glycerol, 0.01% bro-  
837 mophenol blue) for 3 min at 95  $^{\circ}$ C. The eluate was separated on a 10% SDS-PAGE  
838 gel and proteins were detected by silver staining. To perform the experiment re-  
839 ciprocally, 5  $\mu$ g anti-HIS antibody (Genscript, A00186) was captured on Protein G  
840 beads (Dynabeads, Invitrogen) as described above. The recombinant protein  
841 complexes, as above, were then added and incubated in 50  $\mu$ l binding buffer II (25  
842 mM HEPES pH 7.8, 3 mM EDTA, 1 mM DTT, 50  $\mu$ g/ml BSA, 137 mM NaCl) for 45  
843 min with gentle agitation at regular intervals. Beads were then washed 3 times  
844 with wash buffer II (25 mM HEPES pH 7.8, 3 mM EDTA, 1 mM DTT, 80 mM NaCl,  
845 0.1% Triton X-100). The subsequent steps were carried out as described above.  
846 To test for species-specific interactions as shown in Extended Data Fig. 4f, the  
847 same procedure was followed except 100 nM of either hMSH4-hMSH5 or yMsh4-  
848 yMsh5 was incubated with 400 nM hMLH1-hMLH3. To test for the interaction be-  
849 tween yeast yMlh1-yMlh3 and yMsh4-yMsh5, 10  $\mu$ l Protein G beads were used to  
850 capture 1  $\mu$ g anti-STREP antibody (Biorad, MCA2489). yMsh4-yMsh5 (120 nM)  
851 was incubated with the beads in 60  $\mu$ l binding buffer III (25 mM Tris-HCl pH 7.5,  
852 3 mM EDTA, 1 mM DTT, 20 mg/ml BSA, 68 mM NaCl) for 60 min with continuous  
853 mixing. Next, the beads were washed 3 times with 150  $\mu$ l wash buffer III (25 mM  
854 Tris-HCl pH 7.5, 3 mM EDTA, 1 mM DTT, 120 mM NaCl, 0.05% Triton X-100). 300  
855 nM yMlh1-yMlh3 was then added to the resuspended beads in 60  $\mu$ l binding  
856 buffer III, and incubated for additional 60 min with continuous mixing. Beads  
857 were washed 3 times with 150  $\mu$ l wash buffer III and boiled afterwards for 3 min  
858 at 95  $^{\circ}$ C in SDS buffer to elute the proteins. The protein complexes were detected  
859 by western blot with anti-HIS antibody (Genscript, A00186).  
860 To test for the interaction between hMLH1-hMLH3 and hEXO1(D173A), 0.33  $\mu$ g  
861 anti-MLH1 antibody (Abcam ab223844) was captured on 10  $\mu$ l protein G

862 magnetic beads (Dynabeads, Invitrogen) by incubating in 50  $\mu$ l PBS-T (PBS with  
863 0.1% Tween-20) for 2 h at 4 °C with gentle mixing at regular intervals. The  
864 beads were washed 4 times on magnetic racks with 150  $\mu$ l PBS-T to remove un-  
865 bound antibody. The beads were then mixed with 1  $\mu$ g recombinant hMLH1-  
866 hMLH3 and 0.5  $\mu$ g hEXO1(D173A) in 200  $\mu$ l binding buffer I (25 mM Tris-HCl pH  
867 7.5, 3 mM EDTA, 1 mM DTT, 20  $\mu$ g/ml BSA, 300 mM NaCl) and incubated on ice  
868 for 2 h with gentle agitation at regular intervals. Beads were then washed 4  
869 times with 300  $\mu$ l wash buffer I (50 mM Tris-HCl pH 7.5, 3 mM EDTA, 1 mM DTT,  
870 300 mM NaCl, 0.05% Triton X-100) and proteins were eluted by boiling the  
871 beads in SDS buffer (50 mM Tris-HCl pH 6.8, 1.6% sodium dodecyl sulphate, 100  
872 mM DTT, 10% glycerol, 0.01% bromophenol blue) for 3 min at 95 °C. The eluate  
873 was separated on a 10% SDS-PAGE gel and proteins were detected by silver  
874 staining.

875 To test for the interaction between hMLH1-hMLH3 and hPCNA or hEXO1, 1  $\mu$ g  
876 anti-MLH1 antibody (Abcam ab223844) was captured on 15  $\mu$ l protein G mag-  
877 netic beads (Dynabeads, Invitrogen) by incubating in 50  $\mu$ l PBS-T (PBS with  
878 0.1% Tween-20) for 1 h at room temperature with gentle mixing at regular in-  
879 tervals. The beads were washed 3 times on magnetic racks with 150  $\mu$ l PBS-T to  
880 remove unbound antibody. The beads were then mixed with 1.5  $\mu$ g each recom-  
881 binant hMLH1-hMLH3 and hPCNA or hEXO1, in 60  $\mu$ l binding buffer I (25 mM  
882 Tris-HCl pH 7.5, 3 mM EDTA, 1 mM DTT, 20  $\mu$ g/ml BSA, 60 mM NaCl) and incu-  
883 bated on ice for 1 h with gentle agitation at regular intervals. Beads were then  
884 washed 4 times with 150  $\mu$ l wash buffer I (50 mM Tris-HCl pH 7.5, 3 mM EDTA,  
885 1 mM DTT, 120 mM NaCl, 0.05% Triton X-100) and proteins were eluted by boil-  
886 ing the beads in SDS buffer (50 mM Tris-HCl pH 6.8, 1.6% sodium dodecyl sul-  
887 phate, 100 mM DTT, 10% glycerol, 0.01% bromophenol blue) for 3 min at 95 °C.  
888 Avidin (Sigma, A9275, 110 ng/ $\mu$ l) was added to the eluate as a stabilizer. The  
889 eluate was separated on a 10% SDS-PAGE gel and proteins were detected by sil-  
890 ver staining.

891

892 **Yeast manipulations**

893 All yeast strains are derivatives of the SK1 background and are listed in Table S1.  
894 Yeast strains were obtained by direct transformation or crossing to obtain the de-  
895 sired genotype. The following alleles have been described previously: *mlh1Δ*,  
896 *mlh3Δ* as well as spore-autonomous fluorescent marker for the live cell recomb-  
897 ination assays<sup>9,50</sup>.

898 YIplac211 plasmid derivatives carrying *MLH1* (pYIplac211-*MLH1*) or *MLH3*  
899 (pYIplac211-*MLH3*), as well as the respective promoter (~ 500bp upstream of  
900 ATG) and terminator (~ 200bp downstream of STOP) regions were used to com-  
901 plement *mlh1Δ* or *mlh3Δ* mutant strains, respectively. pYIplac211-*MLH1* and  
902 pYIplac211-*MLH3* were linearized and integrated in the promoter region of the  
903 respective genomic loci. pYIplac211-*MLH1*<sup>Q572A-L575A-F578A</sup> (encoding Mlh1<sup>P</sup>) and  
904 pYIplac211-*MLH3*<sup>Q293A-V296A-F300A</sup> (encoding Mlh3<sup>P</sup>) were generated by restriction  
905 digest-mediated insertion of a synthetic fragment carrying the respective muta-  
906 tions into pYIplac211-*MLH1* or pYIplac211-*MLH3*.

907 Rfc1 was C-terminally tagged with TAP tag. The Mlh1-HA allele was described  
908 previously<sup>51</sup>. Transformants were confirmed using PCR discriminating between  
909 correct and incorrect integrations and sequencing. All experiments were per-  
910 formed at 30 °C. Two different approaches were used for meiosis induction. In the  
911 first one, cells were grown in SPS presporulation medium and transferred in spor-  
912 ulation medium as described<sup>52</sup>. For highly synchronous copper-inducible meio-  
913 sis, the procedure as described<sup>53</sup>. Briefly, cells were grown in YPD to exponential  
914 phase. Exponentially growing yeast were inoculated at OD<sub>600</sub> = 0.05 into reduced  
915 glucose YPD (1% yeast extract, 2% peptone, 1% glucose) and grown to an OD<sub>600</sub>  
916 = 11-12 for 16-18 h. Cells were washed, resuspended in sporulation medium  
917 (1.0% [w/v] potassium acetate, 0.02% [w/v] raffinose, 0.001% polypropylene  
918 glycol) at OD<sub>600</sub> = 2.5. After 2 h, copper(II) sulfate (50 μM) was added to induce  
919 *IME1* expression from the *CUP1* promoter.

920

### 921 **Analysis of recombination using spore-autonomous fluorescence**

922 The spore-autonomous fluorescence analysis of recombination was performed as  
923 described<sup>50</sup>, with some minor modifications. Diploid yeast cell colonies were  
924 streaked on YP<sub>2%glycerol</sub> plates, grown for 48 h, and single colonies were expanded  
925 twice in YPD plates at 30 °C for 24 h. Cells were then transferred to sporulation

926 medium plates (SPM, 2% KAc) and incubated at 30 °C for 48 h. Spores were re-  
927 suspended in SPM, briefly sonicated and transferred onto Poly-L-Lysine coated  
928 microscopy slides. Images were captured in four channels using a Wide-field Del-  
929 taVision multiplexed microscope with a 60x 1.4NA DIC Oil PlanApoN objective  
930 and a peco.edge 5.5 camera under the control of Softworx (Applied Precision).  
931 Images were processed in Fiji and the pattern of spore fluorescence in tetrads was  
932 manually scored. Only tetrads with each fluorescent marker occurring in two  
933 spores were included in the final assay. Recombination frequency, expressed as  
934 map distance in centimorgans was calculated using the Stahl lab online tools  
935 (<https://elizabethhousworth.com/StahlLabOnlineTools/>)<sup>54</sup>. Three biological  
936 replicates using independent clones were analyzed. ≥900 tetrads were scored for  
937 each genotype.

938

### 939 **Analysis of spore viability**

940 Spore viability was determined by microdissection of ≥ 156 spores from at least  
941 two biological replicates after induction of meiosis on SPM plates at 30 °C for 24  
942 h.

943

### 944 **Co-immunoprecipitation and Western blot analysis**

945  $1.2 \times 10^9$  cells were harvested, washed once with PBS, and lysed in 3 ml lysis buffer  
946 [20 mM HEPES-KOH pH 7.5, 150 mM NaCl, 0.5% Triton X-100, 10% glycerol, 1  
947 mM MgCl<sub>2</sub>, 2 mM EDTA; 1 mM PMSF; 1 x Complete Mini EDTA-Free (Roche); 1X  
948 PhosSTOP (Roche); 125 U/ml benzonase] with glass beads three times for 30 s in  
949 a Fastprep instrument (MP Biomedicals, Santa Ana, CA). The lysate was incubated  
950 1 h at 4 °C. 100 µl of PanMouse IgG magnetic beads (Thermo Scientific) were  
951 washed with 100 µl lysis buffer, preincubated in 100 µg/ml BSA in lysis buffer for  
952 2 h at 4 °C and then washed twice with 100 µl lysis buffer. The lysate was cleared  
953 by centrifugation at 13,000 x g for 5 min and incubated overnight at 4 °C with  
954 washed PanMouse IgG magnetic beads. The magnetic beads were washed four  
955 times with 1 ml wash buffer [20 mM HEPES-KOH pH7.5, 150 mM NaCl, 0.5% Tri-  
956 ton X-100, 5% Glycerol, 1 mM MgCl<sub>2</sub>, 2 mM EDTA, 1 mM PMSF, 1 x Complete Mini  
957 EDTA-Free (Roche)]. The beads were resuspended in 30 µl TEV-C buffer (20 mM  
958 Tris-HCl pH 8, 0.5 mM EDTA, 150 mM NaCl, 0.1% NP-40, 5% glycerol, 1 mM

959 MgCl<sub>2</sub>, 1 mM DTT) with 3 µl TEV protease (1 mg/ml) and incubated for 2 h at 23  
960 °C under agitation. The eluate was transferred to a new tube. Beads eluate was  
961 heated at 95 °C for 10 min and loaded on polyacrylamide gel [4-12% Bis-Tris gel  
962 (Invitrogen)] and run in MOPS SDS Running Buffer (Life Technologies). Proteins  
963 were then transferred to PVDF membrane using Trans-Blot® Turbo™ Transfer  
964 System (Biorad) at 1 A constant, up to 25 V for 45 min. Proteins were detected  
965 using c-Myc mouse monoclonal antibody (9E10, Santa Cruz, 1:500), HA.11 mouse  
966 monoclonal antibody (16B12, Biolegend, 1/750) or TAP rabbit monoclonal anti-  
967 body (Invitrogen, 1:4,000). The TAP antibody still detects the CBP (Calmodulin  
968 Binding Protein) moiety after TEV cleavage of the TAP tag. Signal was detected  
969 using the SuperSignal West Pico or Femto Chemiluminescent Substrate (Ther-  
970 moFisher). Images were acquired with a Chemidoc system (Biorad).

971

#### 972 **Chromatin immunoprecipitation, real-time quantitative PCR and ChIPseq**

973 For each meiotic time point, 2x10<sup>8</sup> cells were processed as described<sup>55</sup>, with the  
974 following modifications: lysis was performed in lysis buffer plus 1 mM PMSF, 50  
975 µg/ml aprotinin and 1x Complete Mini EDTA-Free (Roche), using 0.5 mm zirco-  
976 nium/silica beads (Biospec Products, Bartlesville, OK). The lysate was directly ap-  
977 plied on 50 µl PanMouse IgG magnetic beads. Before use, magnetic beads were  
978 blocked with 5 µg/µl BSA for 4 h at 4 °C.

979 Quantitative PCR was performed from the immunoprecipitated DNA or the whole  
980 cell extract using a QuantStudio 5 Real-Time PCR System and SYBR Green PCR  
981 master mix (Applied Biosystems, Thermo Scientific) as described<sup>55</sup>. Results were  
982 expressed as % of DNA in the total input present in the immunoprecipitated sam-  
983 ple and normalized by the negative control site in the middle of *NFT1*, a 3.5 kb  
984 long gene. For the meiotic time-course in Figure 5f, the data were further normal-  
985 ized by the value at the 2 h time-point (time of meiosis induction by copper addi-  
986 tion). Primers for *GAT1*, *BUD23*, *HIS4LEU2*, *Axis* and *NFT1* have been described.

987

#### 988 **References**

989

990 1 Hunter, N. Meiotic Recombination: The Essence of Heredity. *Cold Spring*  
991 *Harb Perspect Biol* 7, doi:10.1101/cshperspect.a016618 (2015).



- 992 2 Nishant, K. T., Plys, A. J. & Alani, E. A mutation in the putative MLH3  
993 endonuclease domain confers a defect in both mismatch repair and meiosis in  
994 *Saccharomyces cerevisiae*. *Genetics* **179**, 747-755,  
995 doi:10.1534/genetics.108.086645 (2008).
- 996 3 Zakharyevich, K., Tang, S., Ma, Y. & Hunter, N. Delineation of joint  
997 molecule resolution pathways in meiosis identifies a crossover-specific  
998 resolvase. *Cell* **149**, 334-347, doi:10.1016/j.cell.2012.03.023 (2012).
- 999 4 Zakharyevich, K. *et al.* Temporally and biochemically distinct activities of  
1000 Exo1 during meiosis: double-strand break resection and resolution of double  
1001 Holliday junctions. *Mol Cell* **40**, 1001-1015,  
1002 doi:10.1016/j.molcel.2010.11.032 (2010).
- 1003 5 Lynn, A., Soucek, R. & Borner, G. V. ZMM proteins during meiosis:  
1004 crossover artists at work. *Chromosome Res* **15**, 591-605, doi:10.1007/s10577-  
1005 007-1150-1 (2007).
- 1006 6 Snowden, T., Acharya, S., Butz, C., Berardini, M. & Fishel, R. hMSH4-  
1007 hMSH5 recognizes Holliday Junctions and forms a meiosis-specific sliding  
1008 clamp that embraces homologous chromosomes. *Mol Cell* **15**, 437-451,  
1009 doi:10.1016/j.molcel.2004.06.040 (2004).
- 1010 7 Borner, G. V., Kleckner, N. & Hunter, N. Crossover/noncrossover  
1011 differentiation, synaptonemal complex formation, and regulatory surveillance  
1012 at the leptotene/zygotene transition of meiosis. *Cell* **117**, 29-45 (2004).
- 1013 8 Marsolier-Kergoat, M. C., Khan, M. M., Schott, J., Zhu, X. & Llorente, B.  
1014 Mechanistic View and Genetic Control of DNA Recombination during  
1015 Meiosis. *Mol Cell* **70**, 9-20 e26, doi:10.1016/j.molcel.2018.02.032 (2018).
- 1016 9 Arter, M. *et al.* Regulated Crossing-Over Requires Inactivation of  
1017 Yen1/GEN1 Resolvase during Meiotic Prophase I. *Dev Cell* **45**, 785-800  
1018 e786, doi:10.1016/j.devcel.2018.05.020 (2018).
- 1019 10 Keeney, S., Giroux, C. N. & Kleckner, N. Meiosis-specific DNA double-  
1020 strand breaks are catalyzed by Spo11, a member of a widely conserved  
1021 protein family. *Cell* **88**, 375-384 (1997).
- 1022 11 Ottolini, C. S. *et al.* Genome-wide maps of recombination and chromosome  
1023 segregation in human oocytes and embryos show selection for maternal  
1024 recombination rates. *Nat Genet* **47**, 727-735, doi:10.1038/ng.3306 (2015).
- 1025 12 Svetlanov, A., Baudat, F., Cohen, P. E. & de Massy, B. Distinct functions of  
1026 MLH3 at recombination hot spots in the mouse. *Genetics* **178**, 1937-1945,  
1027 doi:10.1534/genetics.107.084798 (2008).
- 1028 13 De Muyt, A. *et al.* BLM helicase ortholog Sgs1 is a central regulator of  
1029 meiotic recombination intermediate metabolism. *Mol Cell* **46**, 43-53,  
1030 doi:10.1016/j.molcel.2012.02.020 (2012).
- 1031 14 Wang, T. F., Kleckner, N. & Hunter, N. Functional specificity of MutL  
1032 homologs in yeast: evidence for three Mlh1-based heterocomplexes with  
1033 distinct roles during meiosis in recombination and mismatch correction. *Proc*  
1034 *Natl Acad Sci U S A* **96**, 13914-13919 (1999).
- 1035 15 Lipkin, S. M. *et al.* Meiotic arrest and aneuploidy in MLH3-deficient mice.  
1036 *Nat Genet* **31**, 385-390, doi:10.1038/ng931 (2002).
- 1037 16 Edelmann, W. *et al.* Meiotic pachytene arrest in MLH1-deficient mice. *Cell*  
1038 **85**, 1125-1134, doi:10.1016/s0092-8674(00)81312-4 (1996).
- 1039 17 Pashaiefar, H. *et al.* Analysis of MLH3 C2531T polymorphism in Iranian  
1040 women with unexplained infertility. *Iran J Reprod Med* **11**, 19-24 (2013).

- 1041 18 Ranjha, L., Anand, R. & Cejka, P. The *Saccharomyces cerevisiae* Mlh1-Mlh3  
1042 heterodimer is an endonuclease that preferentially binds to Holliday junctions.  
1043 *J Biol Chem* **289**, 5674-5686, doi:10.1074/jbc.M113.533810 (2014).
- 1044 19 Rogacheva, M. V. *et al.* Mlh1-Mlh3, a meiotic crossover and DNA mismatch  
1045 repair factor, is a Msh2-Msh3-stimulated endonuclease. *J Biol Chem* **289**,  
1046 5664-5673, doi:10.1074/jbc.M113.534644 (2014).
- 1047 20 Kadyrov, F. A., Dzantiev, L., Constantin, N. & Modrich, P. Endonucleolytic  
1048 function of MutLalpha in human mismatch repair. *Cell* **126**, 297-308,  
1049 doi:10.1016/j.cell.2006.05.039 (2006).
- 1050 21 Sonntag Brown, M., Lim, E., Chen, C., Nishant, K. T. & Alani, E. Genetic  
1051 analysis of mlh3 mutations reveals interactions between crossover promoting  
1052 factors during meiosis in baker's yeast. *G3 (Bethesda)* **3**, 9-22,  
1053 doi:10.1534/g3.112.004622 (2013).
- 1054 22 Claeys Bouuaert, C. & Keeney, S. Distinct DNA-binding surfaces in the  
1055 ATPase and linker domains of MutLgamma determine its substrate  
1056 specificities and exert separable functions in meiotic recombination and  
1057 mismatch repair. *PLoS Genet* **13**, e1006722,  
1058 doi:10.1371/journal.pgen.1006722 (2017).
- 1059 23 Nishant, K. T., Chen, C., Shinohara, M., Shinohara, A. & Alani, E. Genetic  
1060 analysis of baker's yeast Msh4-Msh5 reveals a threshold crossover level for  
1061 meiotic viability. *PLoS Genet* **6**, doi:10.1371/journal.pgen.1001083 (2010).
- 1062 24 Santucci-Darmanin, S. *et al.* The DNA mismatch-repair MLH3 protein  
1063 interacts with MSH4 in meiotic cells, supporting a role for this MutL  
1064 homolog in mammalian meiotic recombination. *Hum Mol Genet* **11**, 1697-  
1065 1706 (2002).
- 1066 25 Manhart, C. M. *et al.* The mismatch repair and meiotic recombination  
1067 endonuclease Mlh1-Mlh3 is activated by polymer formation and can cleave  
1068 DNA substrates in trans. *PLoS Biol* **15**, e2001164,  
1069 doi:10.1371/journal.pbio.2001164 (2017).
- 1070 26 Kneitz, B. *et al.* MutS homolog 4 localization to meiotic chromosomes is  
1071 required for chromosome pairing during meiosis in male and female mice.  
1072 *Genes Dev* **14**, 1085-1097 (2000).
- 1073 27 Flores-Rozas, H. & Kolodner, R. D. The *Saccharomyces cerevisiae* MLH3  
1074 gene functions in MSH3-dependent suppression of frameshift mutations. *Proc*  
1075 *Natl Acad Sci U S A* **95**, 12404-12409 (1998).
- 1076 28 Lipkin, S. M. *et al.* MLH3: a DNA mismatch repair gene associated with  
1077 mammalian microsatellite instability. *Nat Genet* **24**, 27-35,  
1078 doi:10.1038/71643 (2000).
- 1079 29 Wu, Y. *et al.* A role for MLH3 in hereditary nonpolyposis colorectal cancer.  
1080 *Nat Genet* **29**, 137-138, doi:10.1038/ng1001-137 (2001).
- 1081 30 Halabi, A., Fuselier, K. T. B. & Grabczyk, E. GAA\*TTC repeat expansion in  
1082 human cells is mediated by mismatch repair complex MutLgamma and  
1083 depends upon the endonuclease domain in MLH3 isoform one. *Nucleic Acids*  
1084 *Res* **46**, 4022-4032, doi:10.1093/nar/gky143 (2018).
- 1085 31 Pinto, R. M. *et al.* Mismatch repair genes Mlh1 and Mlh3 modify CAG  
1086 instability in Huntington's disease mice: genome-wide and candidate  
1087 approaches. *PLoS Genet* **9**, e1003930, doi:10.1371/journal.pgen.1003930  
1088 (2013).
- 1089 32 Su, X. A. & Freudenreich, C. H. Cytosine deamination and base excision  
1090 repair cause R-loop-induced CAG repeat fragility and instability in

- 1091 Saccharomyces cerevisiae. *Proc Natl Acad Sci U S A* **114**, E8392-E8401,  
1092 doi:10.1073/pnas.1711283114 (2017).
- 1093 33 Dherin, C. *et al.* Characterization of a highly conserved binding site of Mlh1  
1094 required for exonuclease I-dependent mismatch repair. *Mol Cell Biol* **29**, 907-  
1095 918, doi:10.1128/MCB.00945-08 (2009).
- 1096 34 Pluciennik, A. *et al.* PCNA function in the activation and strand direction of  
1097 MutLalpha endonuclease in mismatch repair. *Proc Natl Acad Sci U S A* **107**,  
1098 16066-16071, doi:10.1073/pnas.1010662107 (2010).
- 1099 35 Genschel, J. *et al.* Interaction of proliferating cell nuclear antigen with PMS2  
1100 is required for MutLalpha activation and function in mismatch repair. *Proc*  
1101 *Natl Acad Sci U S A* **114**, 4930-4935, doi:10.1073/pnas.1702561114 (2017).
- 1102 36 Rass, U. *et al.* Mechanism of Holliday junction resolution by the human  
1103 GEN1 protein. *Genes Dev* **24**, 1559-1569, doi:10.1101/gad.585310 (2010).
- 1104 37 Prestel, A. *et al.* The PCNA interaction motifs revisited: thinking outside the  
1105 PIP-box. *Cell Mol Life Sci*, doi:10.1007/s00018-019-03150-0 (2019).
- 1106 38 Bruning, J. B. & Shamo, Y. Structural and thermodynamic analysis of  
1107 human PCNA with peptides derived from DNA polymerase-delta p66 subunit  
1108 and flap endonuclease-1. *Structure* **12**, 2209-2219,  
1109 doi:10.1016/j.str.2004.09.018 (2004).
- 1110 39 Lee, S. D. & Alani, E. Analysis of interactions between mismatch repair  
1111 initiation factors and the replication processivity factor PCNA. *J Mol Biol*  
1112 **355**, 175-184, doi:10.1016/j.jmb.2005.10.059 (2006).
- 1113 40 Liberti, S. E. *et al.* Bi-directional routing of DNA mismatch repair protein  
1114 human exonuclease 1 to replication foci and DNA double strand breaks. *DNA*  
1115 *Repair (Amst)* **10**, 73-86, doi:10.1016/j.dnarep.2010.09.023 (2011).
- 1116 41 Shah Punatar, R., Martin, M. J., Wyatt, H. D., Chan, Y. W. & West, S. C.  
1117 Resolution of single and double Holliday junction recombination  
1118 intermediates by GEN1. *Proc Natl Acad Sci U S A* **114**, 443-450,  
1119 doi:10.1073/pnas.1619790114 (2017).
- 1120 42 Li, J., Holzschu, D. L. & Sugiyama, T. PCNA is efficiently loaded on the  
1121 DNA recombination intermediate to modulate polymerase delta, eta, and zeta  
1122 activities. *Proc Natl Acad Sci U S A* **110**, 7672-7677,  
1123 doi:10.1073/pnas.1222241110 (2013).
- 1124 43 Woglar, A. & Villeneuve, A. M. Dynamic Architecture of DNA Repair  
1125 Complexes and the Synaptonemal Complex at Sites of Meiotic  
1126 Recombination. *Cell* **173**, 1678-1691 e1616, doi:10.1016/j.cell.2018.03.066  
1127 (2018).
- 1128 44 El-Shemerly, M., Hess, D., Pyakurel, A. K., Moselhy, S. & Ferrari, S. ATR-  
1129 dependent pathways control hEXO1 stability in response to stalled forks.  
1130 *Nucleic Acids Res* **36**, 511-519, doi:10.1093/nar/gkm1052 (2008).
- 1131 45 Cannavo, E. & Cejka, P. Sae2 promotes dsDNA endonuclease activity within  
1132 Mre11-Rad50-Xrs2 to resect DNA breaks. *Nature* **514**, 122-125,  
1133 doi:10.1038/nature13771 (2014).
- 1134 46 Iaccarino, I., Marra, G., Palombo, F. & Jiricny, J. hMSH2 and hMSH6 play  
1135 distinct roles in mismatch binding and contribute differently to the ATPase  
1136 activity of hMutSalphalpha. *EMBO J* **17**, 2677-2686,  
1137 doi:10.1093/emboj/17.9.2677 (1998).
- 1138 47 Anand, R., Pinto, C. & Cejka, P. Methods to Study DNA End Resection I:  
1139 Recombinant Protein Purification. *Methods Enzymol* **600**, 25-66,  
1140 doi:10.1016/bs.mie.2017.11.008 (2018).

- 1141 48 Palombo, F. *et al.* hMutSbeta, a heterodimer of hMSH2 and hMSH3, binds to  
1142 insertion/deletion loops in DNA. *Curr Biol* **6**, 1181-1184, doi:10.1016/s0960-  
1143 9822(02)70685-4 (1996).
- 1144 49 Reginato, G., Cannavo, E. & Cejka, P. Physiological protein blocks direct the  
1145 Mre11-Rad50-Xrs2 and Sae2 nuclease complex to initiate DNA end  
1146 resection. *Genes Dev*, doi:10.1101/gad.308254.117 (2018).
- 1147 50 Thacker, D., Lam, I., Knop, M. & Keeney, S. Exploiting spore-autonomous  
1148 fluorescent protein expression to quantify meiotic chromosome behaviors in  
1149 *Saccharomyces cerevisiae*. *Genetics* **189**, 423-439,  
1150 doi:10.1534/genetics.111.131326 (2011).
- 1151 51 Duroc, Y. *et al.* Concerted action of the MutLbeta heterodimer and Mer3  
1152 helicase regulates the global extent of meiotic gene conversion. *Elife* **6**,  
1153 doi:10.7554/eLife.21900 (2017).
- 1154 52 Murakami, H., Borde, V., Nicolas, A. & Keeney, S. Gel electrophoresis  
1155 assays for analyzing DNA double-strand breaks in *Saccharomyces cerevisiae*  
1156 at various spatial resolutions. *Methods Mol Biol* **557**, 117-142,  
1157 doi:10.1007/978-1-59745-527-5\_9 (2009).
- 1158 53 Chia, M. & van Werven, F. J. Temporal Expression of a Master Regulator  
1159 Drives Synchronous Sporulation in Budding Yeast. *G3 (Bethesda)* **6**, 3553-  
1160 3560, doi:10.1534/g3.116.034983 (2016).
- 1161 54 Stahl, F. W. & Lande, R. Estimating interference and linkage map distance  
1162 from two-factor tetrad data. *Genetics* **139**, 1449-1454 (1995).
- 1163 55 Borde, V. *et al.* Histone H3 lysine 4 trimethylation marks meiotic  
1164 recombination initiation sites. *EMBO J* **28**, 99-111,  
1165 doi:10.1038/emboj.2008.257 (2009).
- 1166 56 Kadyrova LY, Gujar V, Burdett V, Modrich PL, Kadyrov FA. Human MutL $\gamma$ ,  
1167 the MLH1-MLH3 heterodimer, is an endonuclease that promotes DNA expan-  
1168 sion. *Proc Natl Acad Sci U S A*. 2020. doi:10.1073/pnas.1914718117.  
1169  
1170  
1171  
1172

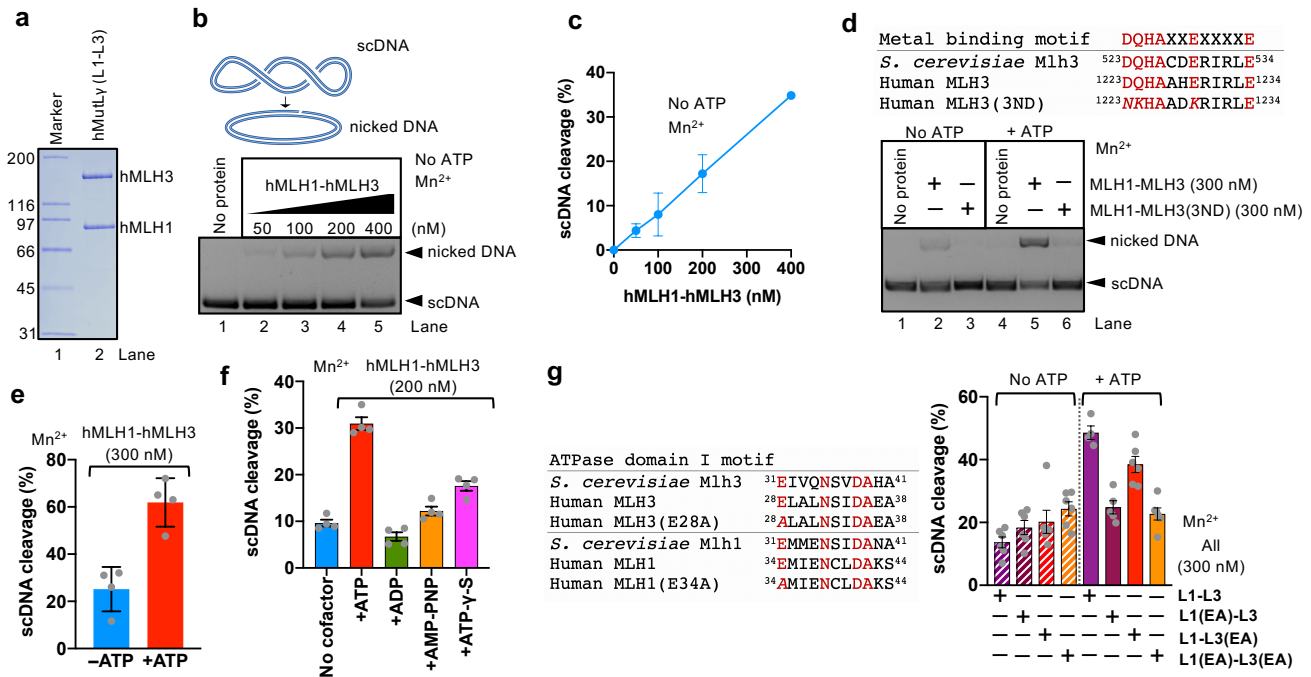

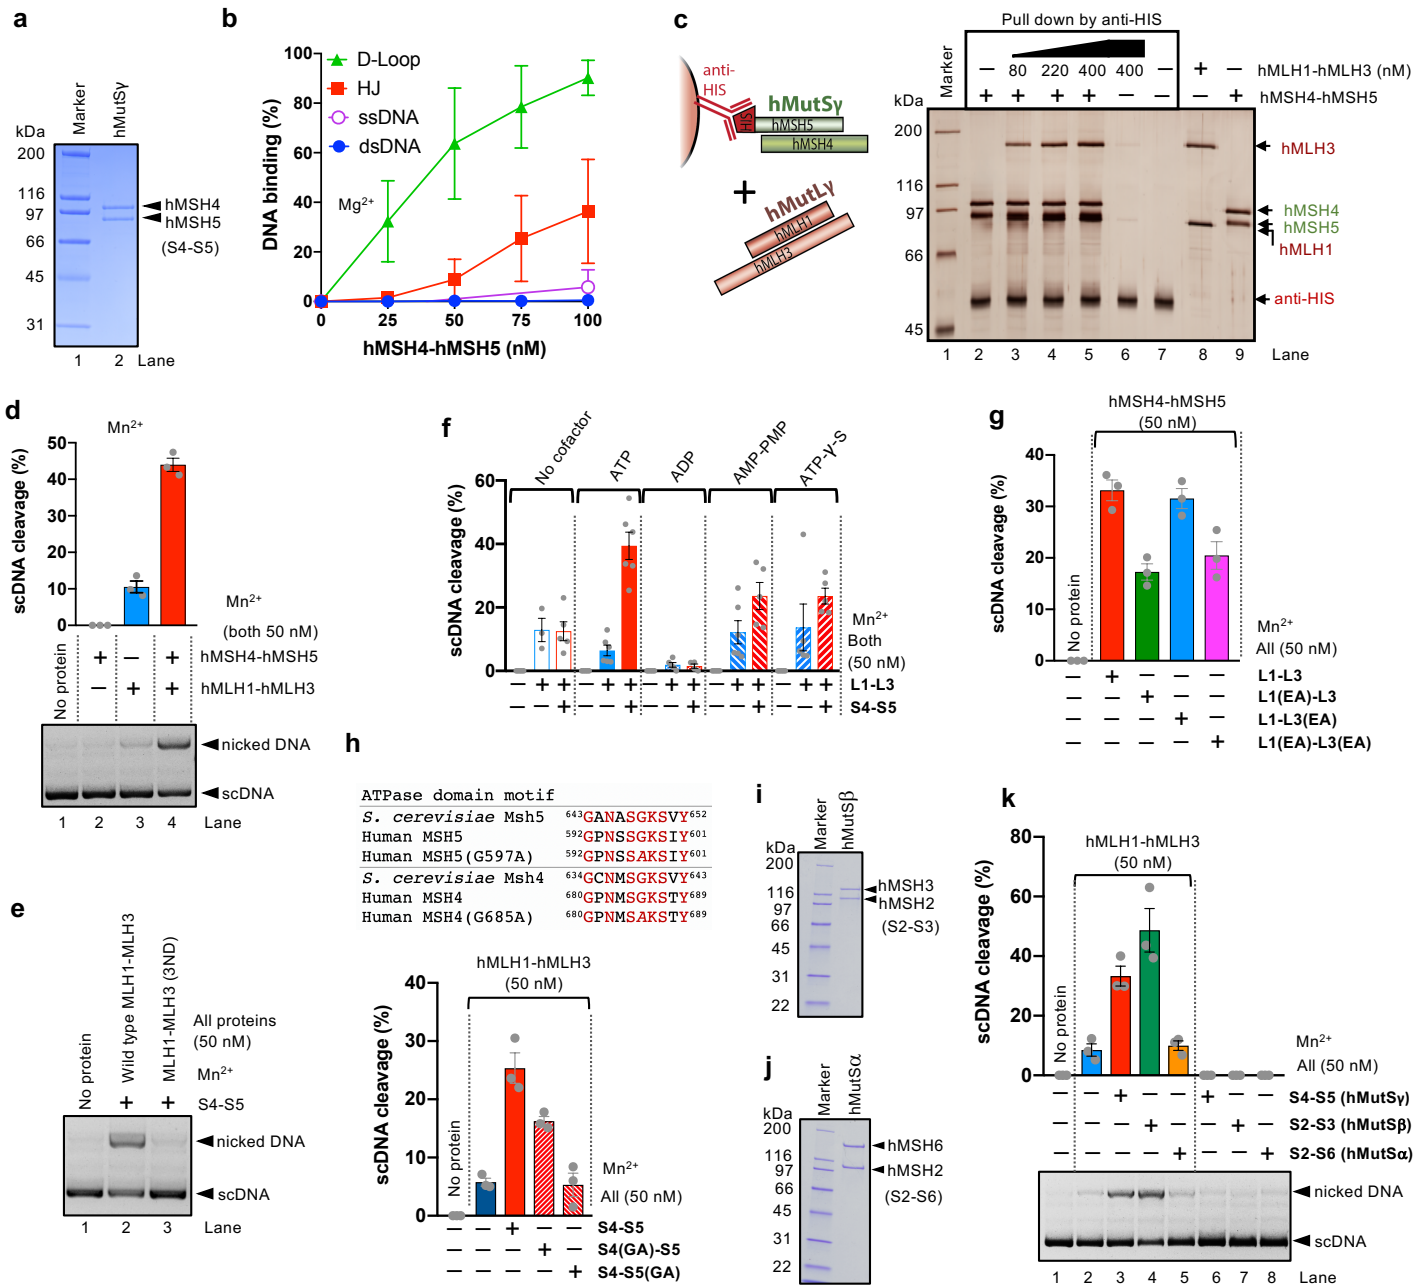

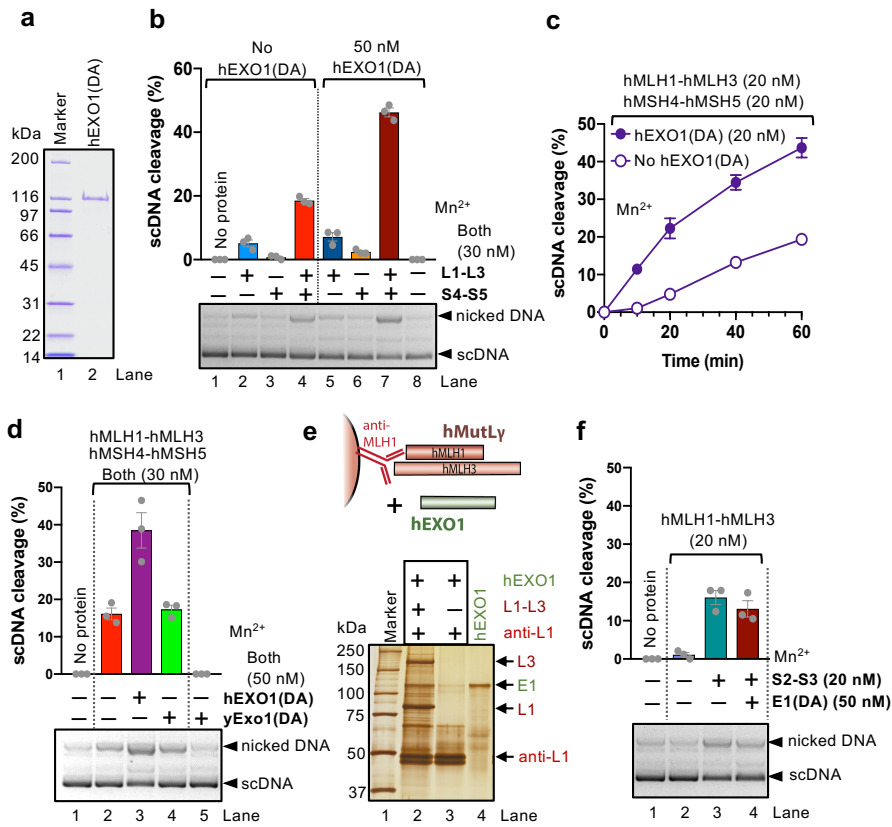





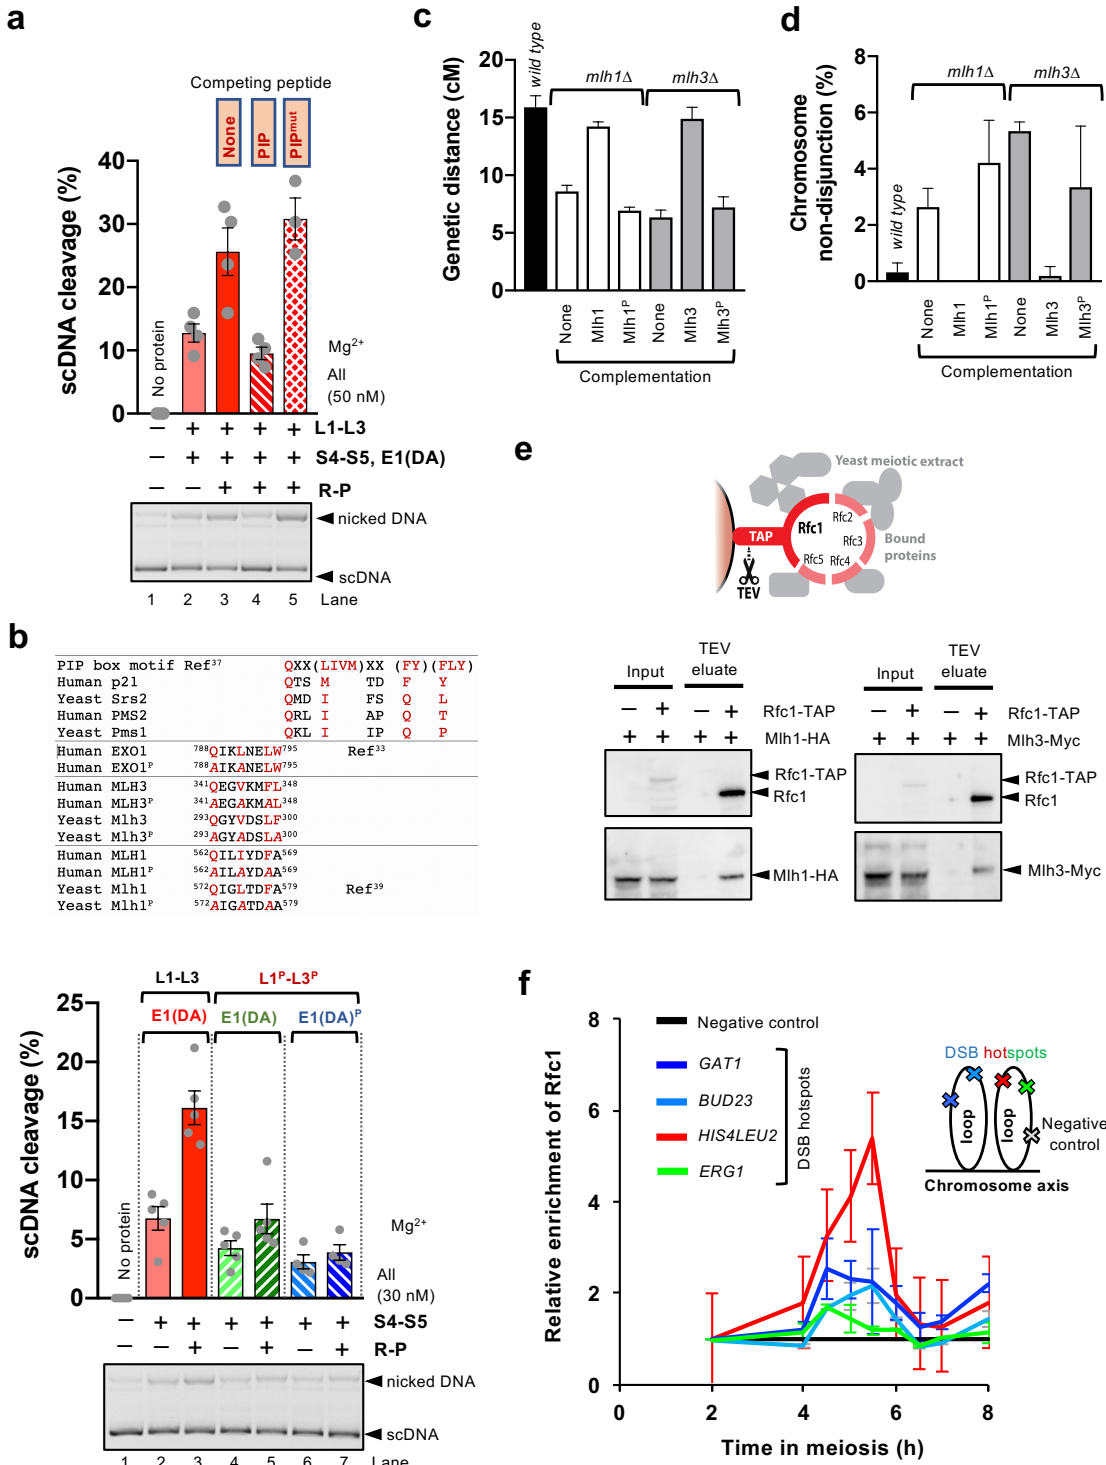

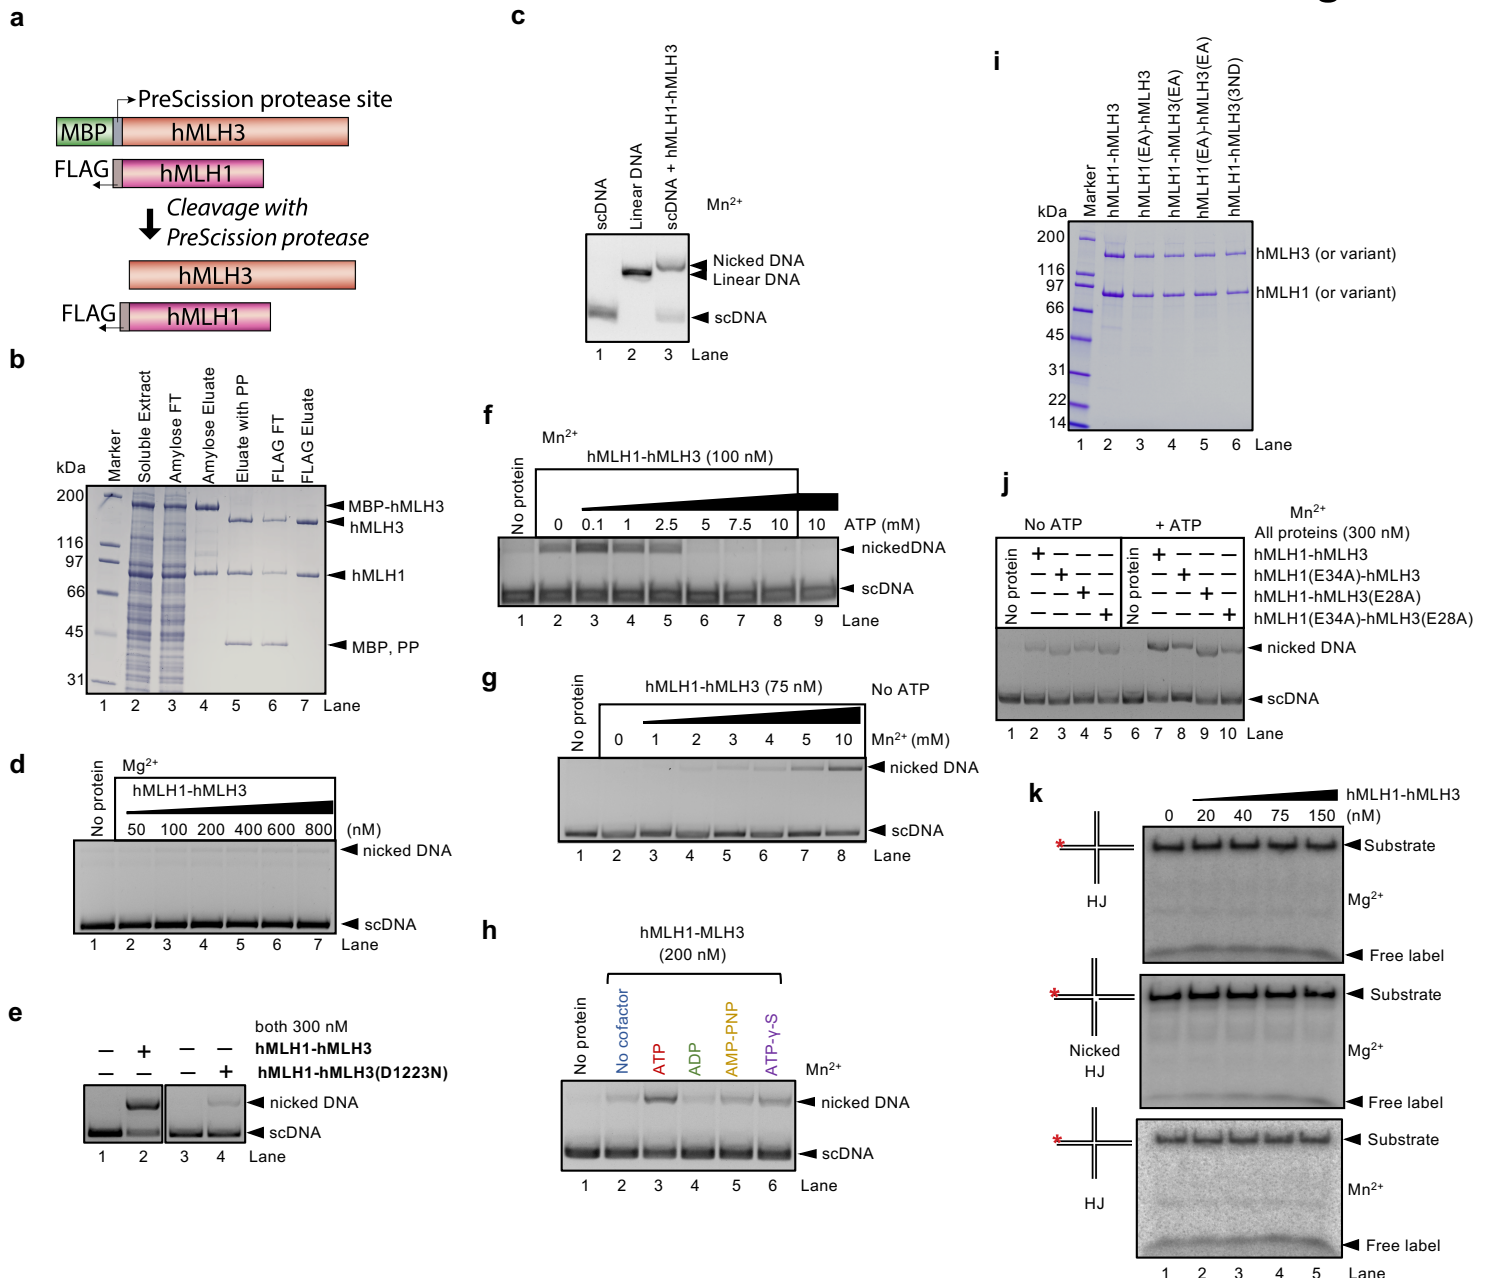

**Extended Data Figure 1. hMLH1-hMLH3 nicks scDNA.** **a**, A scheme of hMLH1 and hMLH3 constructs. The maltose-binding protein (MBP) on hMLH3 was cleaved during protein purification. **b**, A representative purification of the hMLH1-hMLH3 complex. Amylose FT, flowthrough from Amylose resin; FLAG-FT, flowthrough from anti-FLAG resin; PP, PreScission protease; MBP, maltose-binding protein. The 4-15% gradient polyacrylamide gel was stained with Coomassie Blue. **c**, Nuclease assay with hMLH1-hMLH3 (300 nM) and pUC19 (2.6 kbp) scDNA substrates. Linear DNA was used a marker. The assay was carried out at 37 °C and contained 5 mM manganese acetate and ATP (0.5 mM). The hMLH1-hMLH3 nuclease introduces nicks in dsDNA but does not linearize dsDNA. **d**, Nuclease assay with hMLH1-hMLH3 and 5 mM magnesium acetate. The reaction buffer contained ATP (0.5 mM). The assay was carried out at 37 °C. The heterodimer exhibits barely detectable nuclease activity in magnesium. **e**, Representative nuclease assays with pUC19 dsDNA, with ATP (0.5 mM), and either wild type or hMLH1-hMLH3(D1223N), with a single amino acid substitution in the metal binding motif of hMLH3. The mutant retained ~10% nuclease activity, and therefore a variant with three substitutions in the nuclease motif was used in this work (see Fig. 1d and further below). **f**, Nuclease assay with hMLH1-hMLH3 and manganese acetate in the presence of various concentrations of ATP, carried out at 37 °C. Low concentrations of ATP stimulated DNA cleavage, while elevated ATP concentrations were inhibitory. The inhibitory effect is likely due to a decrease in free manganese concentration (see panel g). **g**, Nuclease assay with hMLH1-hMLH3 and various concentrations of manganese acetate. The assay was carried out at 37 °C. **h**, Nuclease assay with hMLH1-hMLH3 and various cofactors (ADP, ATP and non-hydrolysable ATP analogs ATP- $\gamma$ -S and AMP-PNP, all 0.5 mM). The assay was carried out at 37 °C with 5 mM manganese acetate. See Fig. 1f for quantitation of this and similar experiments. **i**, Purified hMLH1-hMLH3 variants used in this study. hMLH1(EA), hMLH1(E34A); hMLH3(EA), hMLH3(E28A); hMLH3(3ND), hMLH3(D1223N, Q1224K, E1229K). **j**, Nuclease assay with wild type hMLH1-hMLH3 and indicated variants deficient in ATP hydrolysis, without or with ATP (0.5 mM). The assay was carried out at 37 °C, with 5 mM manganese acetate. See Fig. 1g for quantitation of this and similar experiments. **k**, Nuclease assays with wild type hMLH1-hMLH3 on oligonucleotide-based DNA substrates (Holliday junction, HJ and nicked Holliday junction, nicked HJ). The asterisk indicates the position of the radioactive label. The assay was carried out at 37 °C, with 5 mM manganese acetate or magnesium acetate, as indicated, with ATP (1 mM). The products were analyzed by 15% denaturing polyacrylamide gel electrophoresis.

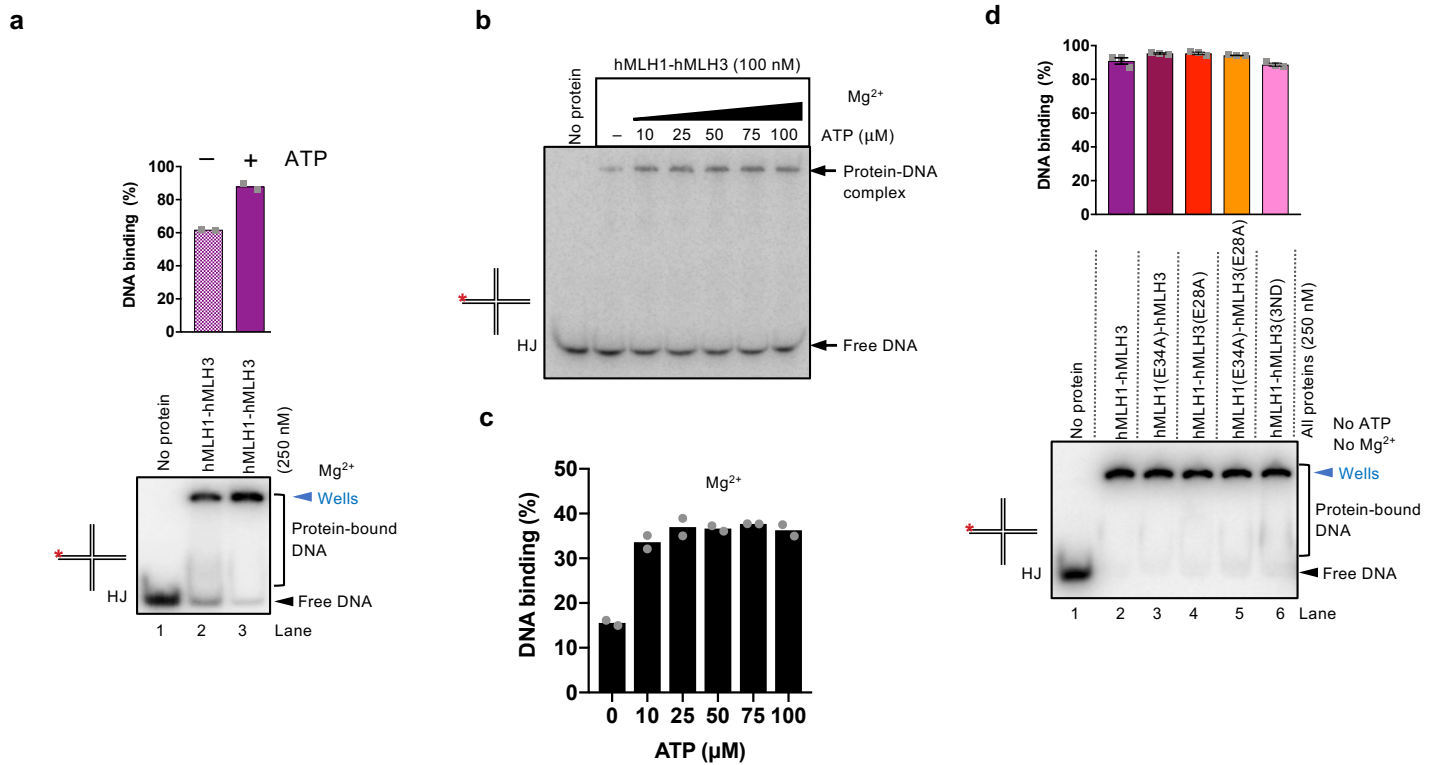

**Extended Data Figure 2. ATP promotes DNA binding by hMLH1-hMLH3.** **a**, Electrophoretic mobility shift assay with hMLH1-hMLH3, without or with ATP (1 mM), with 2 mM magnesium acetate, using oligonucleotide-based HJ as the DNA substrate. Asterisk (\*) indicates the position of the radioactive label. A representative experiment is shown at the bottom, a quantitation (average with individual values from two independent experiments) at the top. **b**, Electrophoretic mobility shift assay with hMLH1-hMLH3, oligonucleotide-based HJ as the DNA substrate, and various ATP concentrations, with 2 mM magnesium acetate, as indicated. The panel shows a representative experiment. **c**, Quantitation of experiments such as shown in panel b. The data points show averages and individual data points from two independent experiments. **d**, Electrophoretic mobility shift assay with indicated hMLH1-hMLH3 variants, oligonucleotide-based HJ as the substrate, in the absence of ATP and no magnesium (with 3 mM EDTA). Asterisk (\*) indicates the position of the radioactive label. A representative experiment is shown at the bottom, a quantitation (averages shown, n=3; error bars, SEM) at the top.

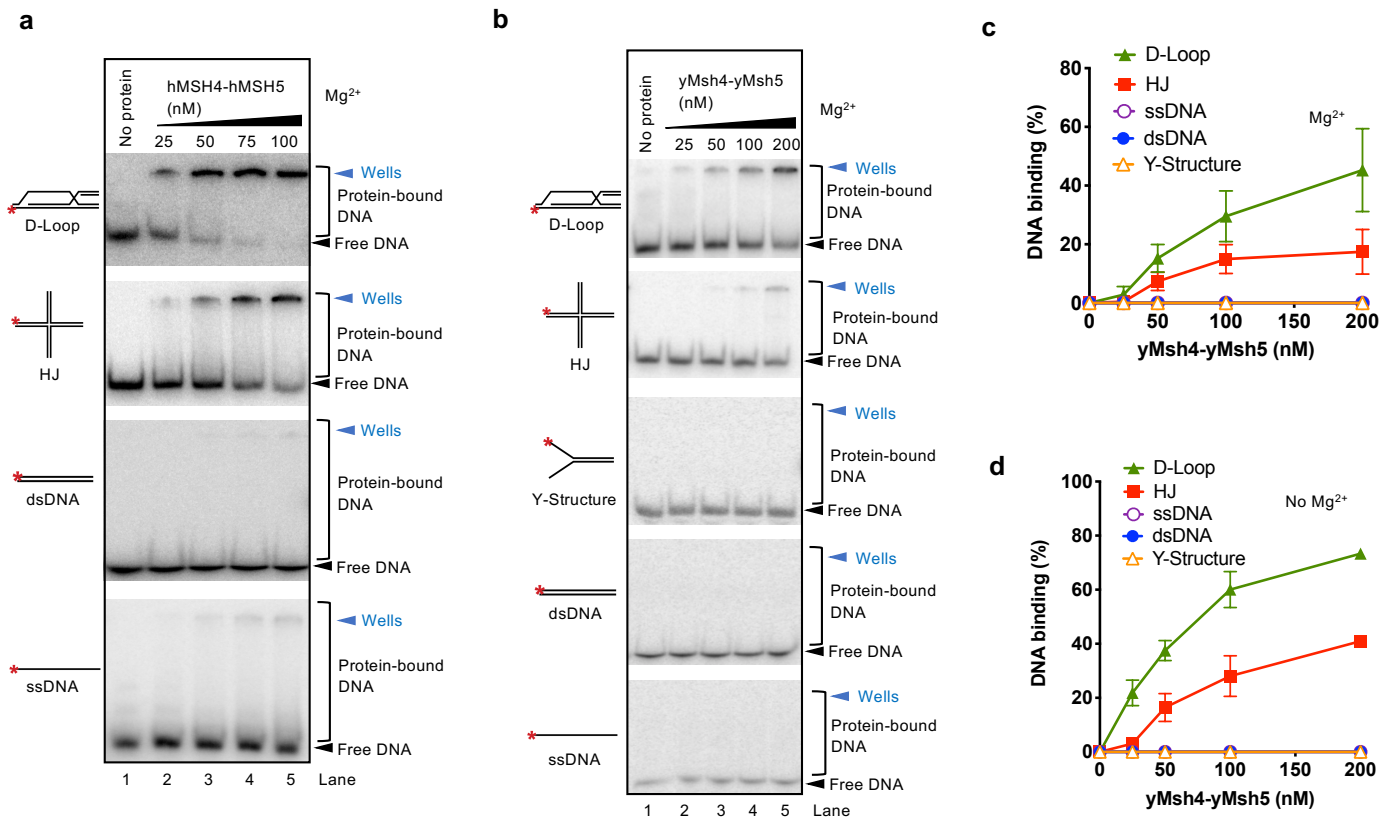

**Extended Data Figure 3. Human and yeast MutSy complexes preferentially bind joint molecule DNA intermediates.**

**a**, Electrophoretic mobility shift assays with hMsh4-hMsh5 and indicated DNA substrates. Asterisk (\*) indicates the position of the radioactive label. The assays were carried out in a buffer containing 2 mM magnesium acetate without ATP. For quantitation of this and similar experiments, see Fig. 2b. **b**, Electrophoretic mobility shift assays in 6% polyacrylamide gels with yMsh4-yMsh5 and indicated DNA substrates. Asterisk (\*) indicates the position of the radioactive label. The assays were carried out in a buffer containing 2 mM magnesium acetate without ATP. **c**, Quantitation of experiments such as shown in panel b. Averages shown; error bars, SEM; n=3. **d**, Quantification of electrophoretic mobility shift assay with yMsh4-yMsh5 and indicated DNA substrates, without magnesium (with 3 mM EDTA). Averages shown; error bars, SEM; n=3.

## Extended Data Figure 4

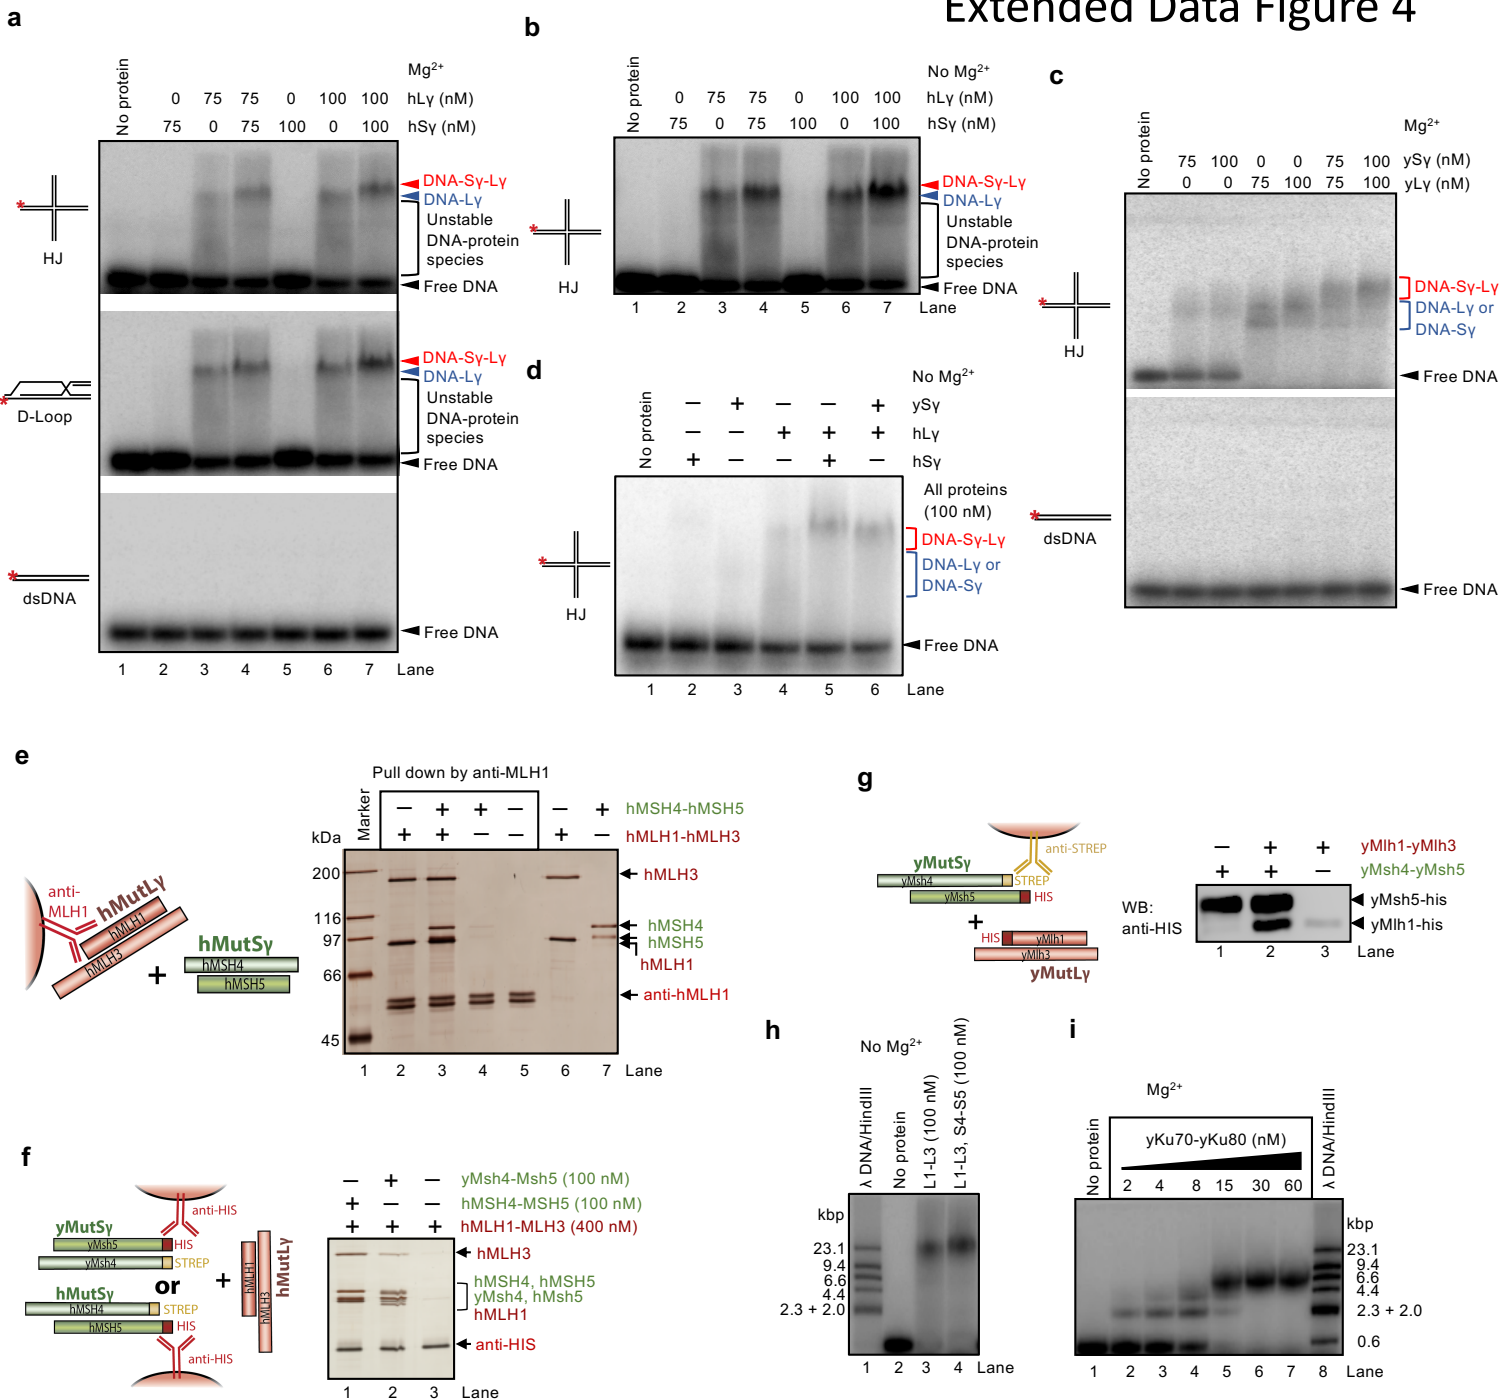

**Extended Data Figure 4. hMSH4-hMSH5 and hMLH1-hMLH3 interact and stabilize each other at DNA junctions.** **a**, To investigate the interplay of hMutLy and hMutSy at DNA junctions, we performed electrophoretic mobility shift assays with either or both complexes under more stringent conditions (75 mM NaCl, 2 mM magnesium acetate), separated on 1% agarose gels. Here, hMSH4-hMSH5 lost the capacity to stably bind HJs/D-Loops, but could help stabilize the hMutSy-hMutLy complex. The binding of hMutLy alone was not stable, as evidenced by a lack of a distinct protein-DNA band and the presence of smear in the lanes indicative of complexes that dissociated during electrophoresis. The addition of hMutSy resulted in a moderate stabilization of the protein-DNA complex, and a minor super-shift in electrophoretic mobility. Shown are representative experiments. **b**, Electrophoretic mobility shift assays as in panel a, but without magnesium (with 3 mM EDTA). **c**, Electrophoretic mobility shift assays as in a, but with yeast MutLy and MutSy complexes. **d**, Assays as in a, with human hMLH1-hMLH3 and either human MSH4-MSH5 or yeast Msh4-Msh5. The supershift was observed only when the cognate human complexes were combined. **e**, Protein interaction assays with immobilized hMLH1-hMLH3 (bait) and hMSH4-hMSH5 (prey). The 10% polyacrylamide gel was stained with silver. **f**, Protein interaction assay with immobilized hMSH4-hMSH5 or yMsh4-yMsh5 that were used as baits, and hMLH1-hMLH3 (prey). The eluted proteins were analyzed by silver staining. Although residual interaction between yMsh4-yMsh5 and hMLH1-hMLH3 was still detected, it was much weaker than the interaction between the cognate hMSH4-hMSH5 and hMLH1-hMLH3 complexes. **g**, Protein interaction assay with immobilized yMsh4-yMsh5 (bait) and yMlh1-yMlh3 (prey). The eluted proteins were analyzed by western blotting. **h**, Electrophoretic mobility shift assays with hMLH1-hMLH3 (L1-L3) and hMSH4-hMSH5 (S4-S5), as indicated, and HJ DNA substrate.  $^{32}$ P-labeled  $\lambda$ DNA/HindIII digest was used as a marker. The DNA-bound hMLH1-hMLH3 and hMSH4-hMSH5 species migrate high up on the agarose gel where the resolution capacity is limited. **i**, Electrophoretic mobility shift assay with yeast Ku70-Ku80 heterodimer and HJ DNA substrate. Ku bound the dsDNA ends of the four HJ arms, resulting in up to 4 heterodimers bound to the DNA substrate (lanes 5-7). Comparison with  $\lambda$  DNA/HindIII and panel h revealed that the Ku-DNA complex migrates much faster than DNA-bound hMLH1-hMLH3 and hMSH4-hMSH5. This suggests that multiple units of hMLH1-hMLH3 and hMSH4-hMSH5 bind DNA.

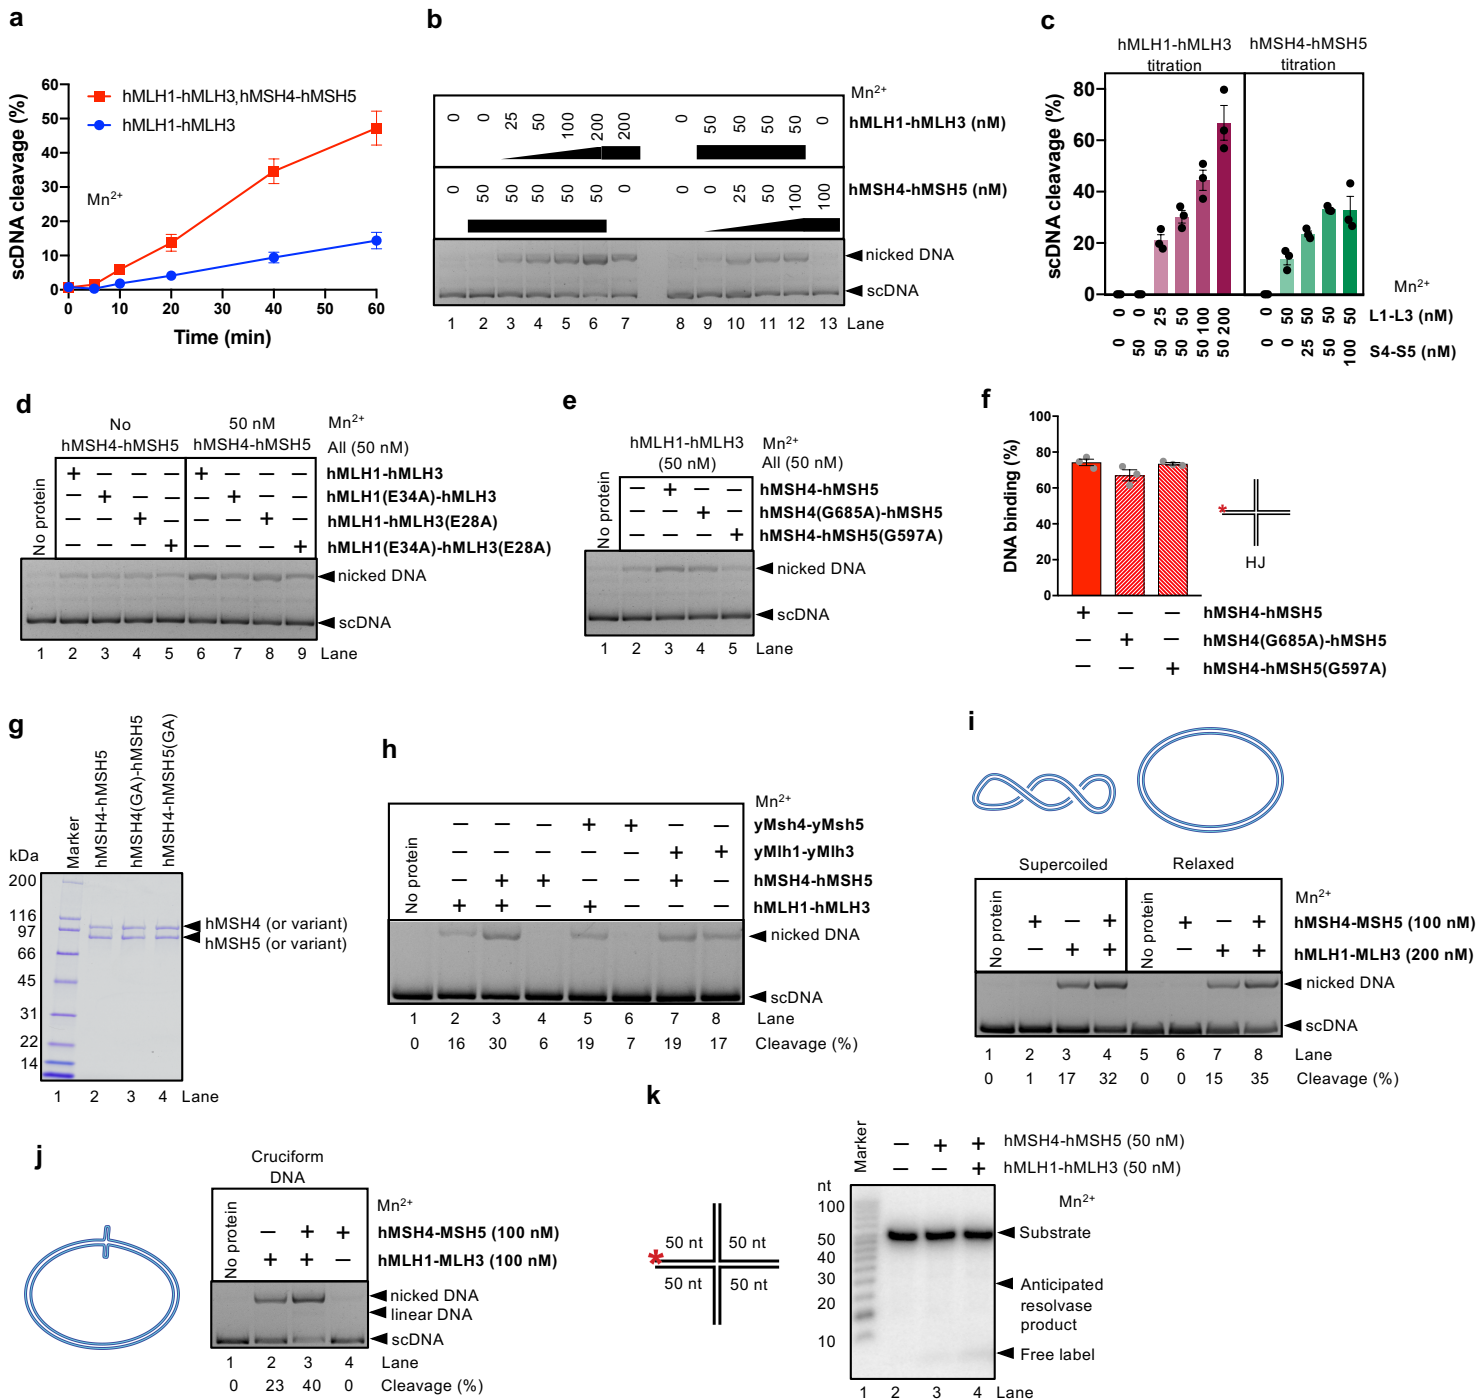

**Extended Data Figure 5. hMSH4-hMSH5 promotes DNA cleavage by hMLH1-MLH3, but does not exhibit resolvase activity.** **a**, Quantitation of kinetic nuclease assays with hMLH1-hMLH3 (50 nM) without or with hMSH4-hMSH5 (50 nM). The assays were carried out at 30 °C in the presence of 5 mM manganese acetate and 2 mM ATP. Averages shown; error bars, SEM; n=3. **b**, Representative nuclease assays with various hMLH1-hMLH3 and hMSH4-hMSH5 concentrations, as indicated. The assays were carried out at 30°C in the presence of 5 mM manganese acetate and 0.5 mM ATP. **c**, Quantitation of experiments such as shown in panel b. Averages shown; error bars, SEM, n=3. The efficiency of nuclease cleavage was generally dependent on the concentrations used. When using 50 nM hMLH1-hMLH3, the maximal cleavage efficiency was achieved together with 50 nM hMSH4-hMSH5, no further increase when using 100 nM hMSH4-hMSH5 was observed. This suggests that both heterodimers may form a stoichiometric complex. *Vice versa*, when using 50 nM hMSH4-hMSH5, a further increase of DNA cleavage was observed when hMLH1-hMLH3 concentrations exceeded 50 nM, which is in agreement with the capacity of hMLH1-hMLH3 to cleave DNA on its own. **d**, Representative nuclease assays with hMSH4-hMSH5 and variants of hMLH1-hMLH3 deficient in ATP hydrolysis, as indicated. The assays were carried out at 30 °C in the presence of 5 mM manganese acetate and 0.5 mM ATP. For the quantification of these and similar data, see Fig. 2g. **e**, Representative nuclease assays with hMLH1-hMLH3 and variants of hMSH4-hMSH5 deficient in ATP hydrolysis, as indicated. The assays were carried out at 30 °C in the presence of 5 mM manganese acetate and 0.5 mM ATP. For the quantification of these and similar data, see Fig. 2h. **f**, Quantitation of electrophoretic mobility shift assays with hMSH4-hMSH5 and its ATPase motif mutant variants. Oligonucleotide-based HJ was used as the substrate. ATP was not included in the binding buffer. The mutations did not affect the capacity of hMSH4-hMSH5 to bind DNA. Averages shown; error bars, SEM; n=3. **g**, Recombinant hMSH4-hMSH5 and its variants used in this study. **h**, Nuclease reactions were carried out with yeast or human MutS $\gamma$  and MutL $\gamma$  complexes, as indicated (50 nM). While human MutS $\gamma$  promoted DNA cleavage by MutL $\gamma$  (compare lanes 2 and 3), yeast MutS $\gamma$  did not promote DNA cleavage by human MutL $\gamma$  (compare lanes 2 and 5), and reciprocally, human MutS $\gamma$  did not promote DNA cleavage by yeast MutL $\gamma$  (compare lanes 7 and 8). Continued on next page.

**Extended Data Figure 5. Continued from previous page.** **i**, Nuclease assay with supercoiled and relaxed DNA and recombinant proteins, as indicated. The MutS $\gamma$  and MutL $\gamma$  complexes cleave supercoiled and relaxed DNA with comparable efficiencies. The quantitation below the lanes represents an average from two independent experiments. **j**, Cleavage of pIRbke8mut cruciform DNA (inverted repeats folding back to form a Holliday junction structure) by MutS $\gamma$  and MutL $\gamma$  complexes. The quantitation below the lanes represents an average from two independent experiments. Simultaneous cleavage of both strands at the junction point would lead to linear DNA. No linear DNA was observed with MutS $\gamma$  and MutL $\gamma$ , indicating a lack of canonical resolvase activity. **k**, A representative nuclease assay with indicated proteins and oligonucleotide-based HJ DNA. No DNA cleavage was observed, indicating a lack of structure-specific DNA cleavage activity on the oligonucleotide-based substrate.

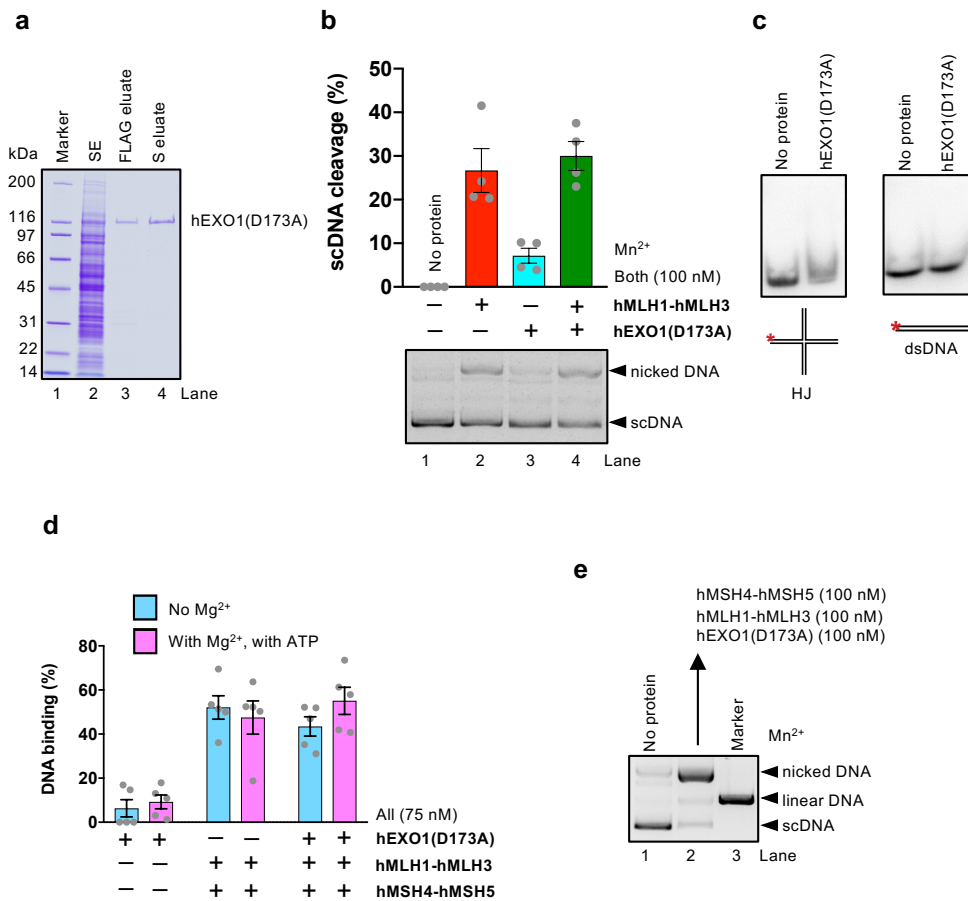

**Extended Data Figure 6. Stimulation of hMLH1-hMLH3 and hMSH4-hMSH5 by hEXO1(D173A).** **a**, Purification of hEXO1(D173A). SE, soluble extract; FLAG eluate, eluate from anti-FLAG affinity resin; S eluate, eluate from HiTrap SP HP column. **b**, Nuclease assays with hMLH1-hMLH3 and/or hEXO1(D173A), as indicated. The assays were carried out at 30 °C in the presence of 5 mM manganese acetate and 0.5 mM ATP. A representative experiment is shown at the bottom, a quantitation (averages shown; n=4; error bars, SEM) at the top. The limited DNA cleavage in lane 3 likely results from residual nuclease activity of hEXO1(D173A) that becomes apparent at high protein concentrations (100 nM) in the presence of manganese. **c**, Representative electrophoretic mobility shift assays with hEXO1(D173A)(100 nM) and oligonucleotide based HJ or dsDNA as substrates. Asterisk (\*) indicates the position of the radioactive label. The binding buffer contained EDTA (3 mM) and no ATP. No stable DNA binding was detected under our conditions. **d**, Quantitation of electrophoretic mobility shift assays with hMLH1-hMLH3, hMSH4-hMSH5 and hEXO1(D173A), as indicated. The protein-DNA species were resolved in 1% agarose gels. Averages shown; error bars, SEM; n=5. hEXO1(D173A) did not notably affect DNA binding of hMLH1-hMLH3 and hMSH4-hMSH5. **e**, Nuclease reactions with hMLH1-hMLH3 (100 nM), hMSH4-hMSH5 (100 nM) and hEXO1(D173A) (100 nM), carried out at 37 °C in the presence of 5 mM manganese acetate and 2 mM ATP. Linearized DNA (lane 3) was used as a marker.



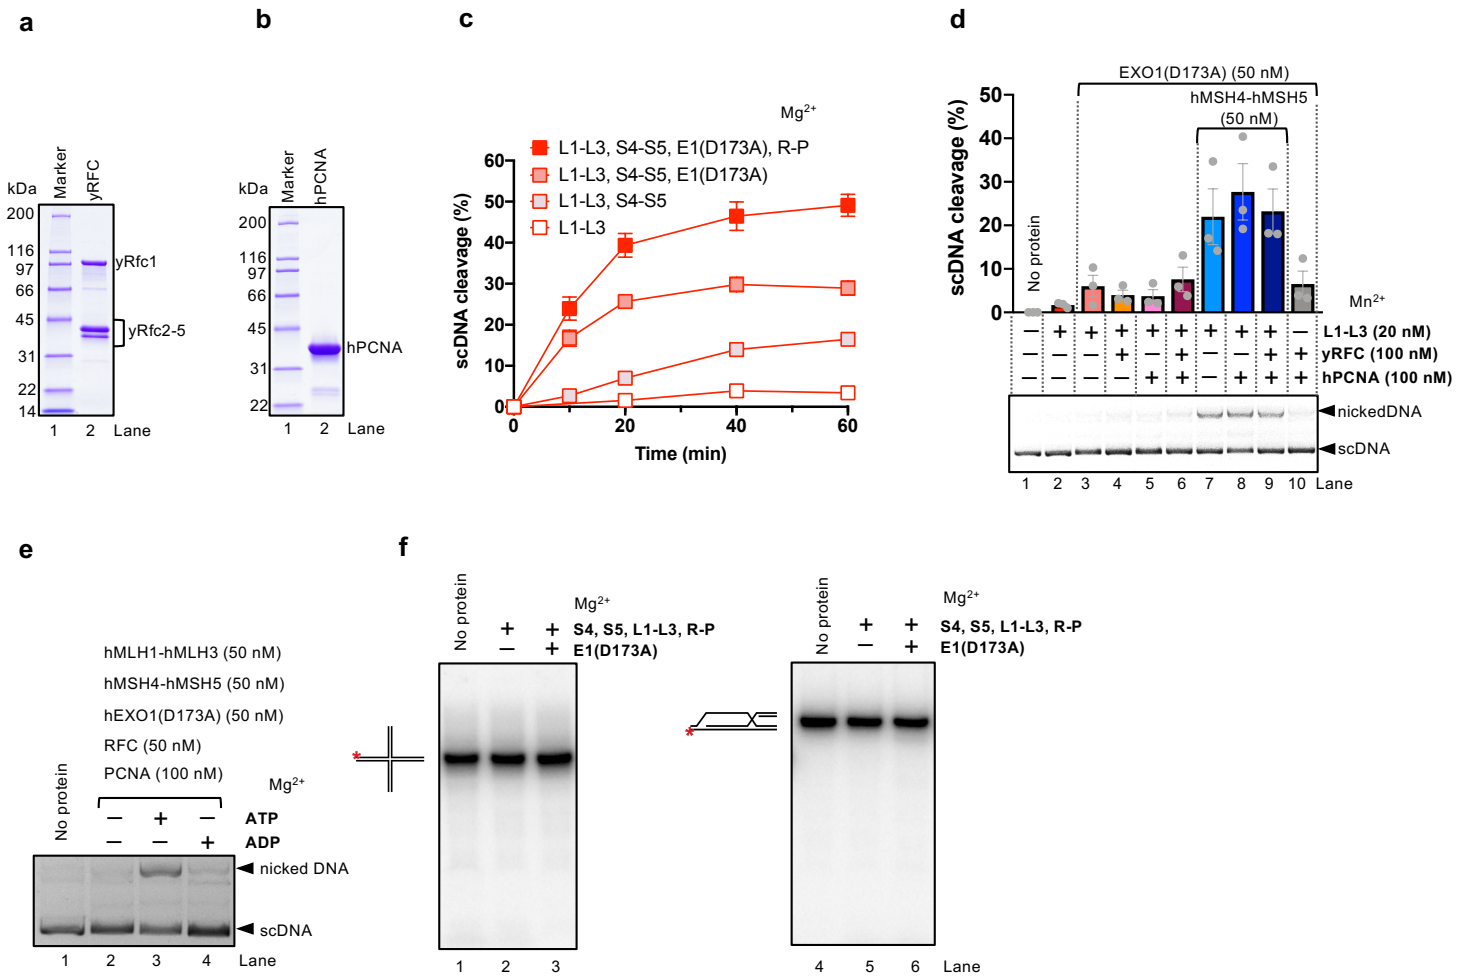

**Extended Data Figure 7. RFC-PCNA do not promote the MLH1-hMLH3 nuclease in reactions with manganese. a,** Recombinant yeast RFC (yRFC) used in this study. **b,** Recombinant human PCNA (hPCNA) used in this study. **c,** Kinetic experiment carried out with hMLH1-hMLH3, L1-L3 (50 nM); hMSH4-hMSH5, S4-S5 (50 nM), EXO1(D173A) (50 nM) and RFC-PCNA (50-100 nM, respectively), as indicated. Reactions were carried out with 5 mM magnesium acetate and 2 mM ATP at 37 °C. Averages shown; error bars, SEM, n=4. **d,** Nuclease assays with hMLH1-hMLH3 (L1-L3), hMSH4-hMSH5 (S4-S5), hEXO1(D173A) without or with RFC/PCNA, as indicated. The assays were carried out at 37 °C in the presence of 5 mM manganese acetate and 2 mM ATP. A representative experiment is shown at the bottom, a quantitation (averages shown; n=3; error bars, SEM) at the top. Under these conditions, no stimulation of DNA cleavage by RFC-PCNA was observed. **e,** Nuclease assay with indicated proteins and magnesium, either with no co-factor (lane 2), with ATP (2 mM, lane 3) or ADP (2 mM, lane 4). ATP is strictly required for DNA cleavage by the nuclease ensemble. **f,** Nuclease assays with indicated oligonucleotide-based substrates carried out at 37 °C in the presence of 5 mM manganese acetate and 2 mM ATP. All proteins 30 nM. Asterisk (\*) indicates the position of the radioactive label. The reaction products were analyzed on a 15% denaturing polyacrylamide gel. No DNA cleavage was observed.

## Extended Data Figure 8

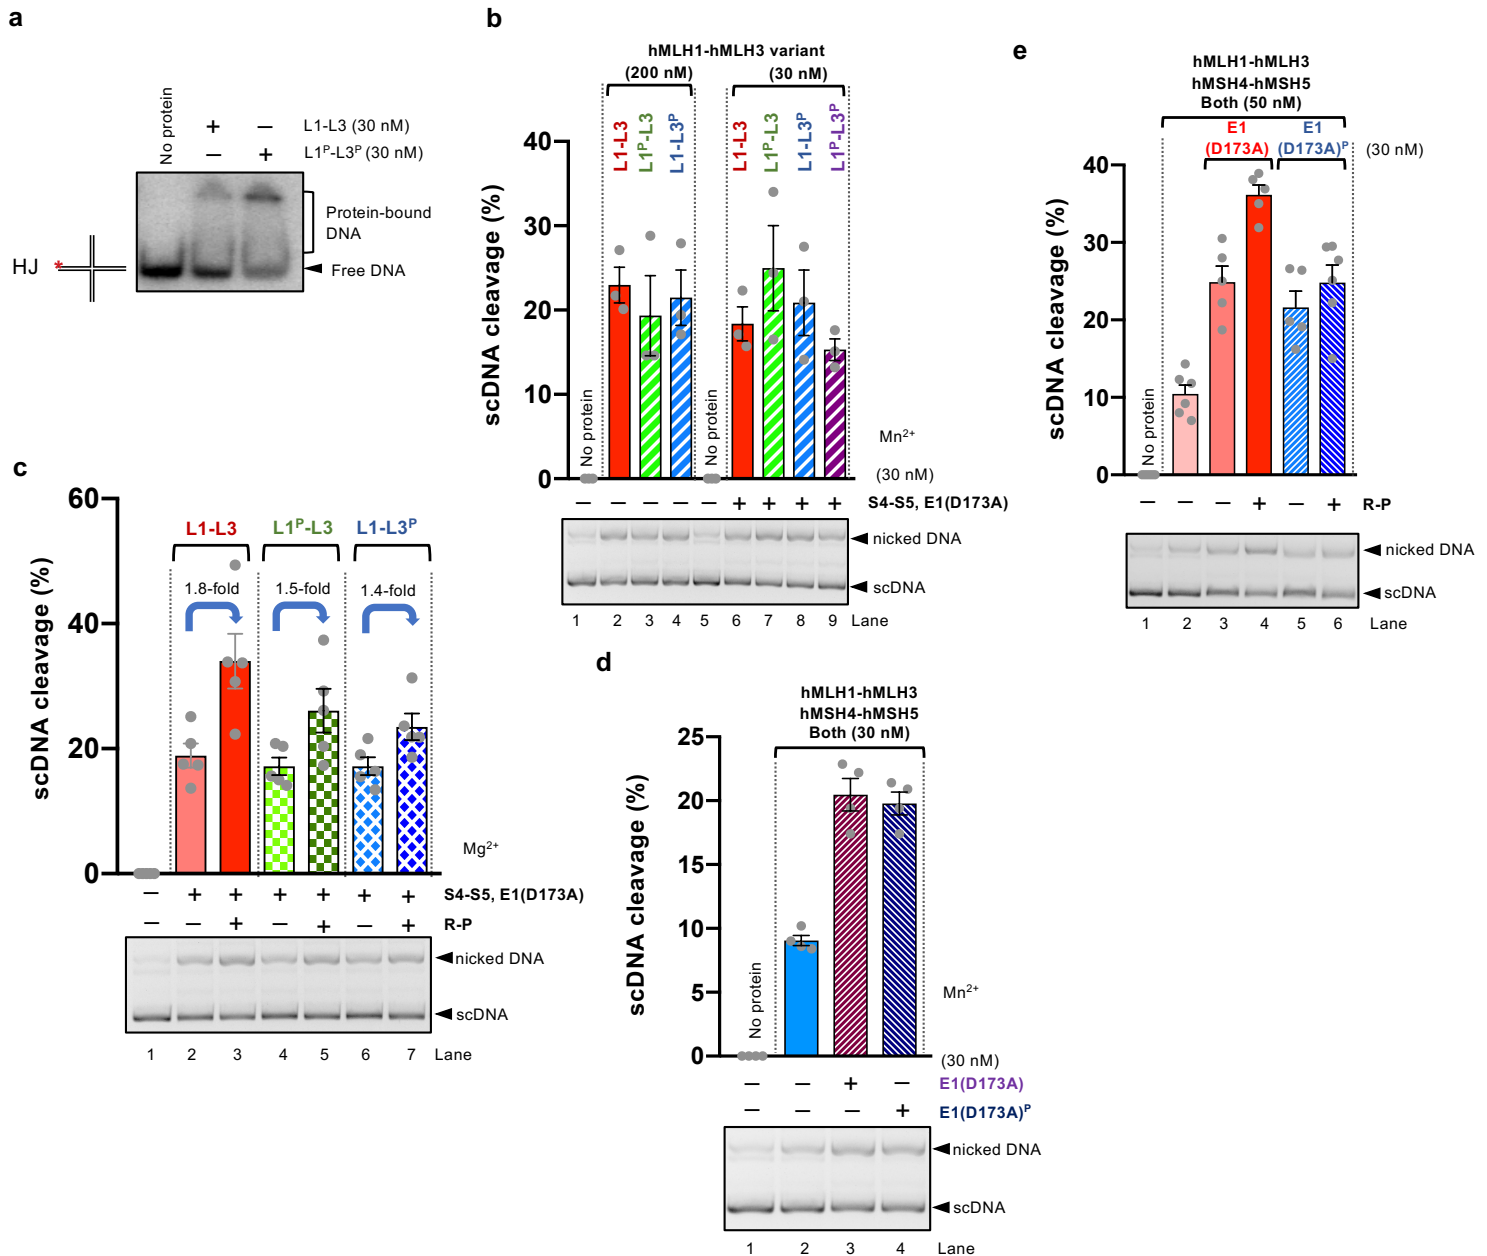

**Extended Data Figure 8. PIP box-like motifs in hEXO1, hMLH3 and hMLH1 facilitate the stimulatory effect of RFC-PCNA on the hMLH3 nuclease ensemble.** **a**, The hMLH1<sup>P</sup>-hMLH3<sup>P</sup> variant (see Fig. 5b) is not impaired in HJ-binding. Electrophoretic mobility shift assay was carried out with 5 ng/μl dsDNA competitor and 3 mM EDTA (no magnesium). **b**, The hMLH1<sup>P</sup> and hMLH3<sup>P</sup> variant combinations are not impaired in nuclease activity without or with hMSH4-hMSH5 and hEXO1(D173A) in the absence of RFC-PCNA. The nuclease assays were performed with 5 mM manganese acetate and 2 mM ATP at 37 °C. Averages shown; error bars, SEM, n=3. **c**, Nuclease assays with hMSH4-hMSH5, S4-S5 (50 nM), hEXO1(D173A) (50 nM) and RFC-PCNA (50-100 nM), and a respective hMLH1-MLH3 (L1-L3) variant, as indicated (see Fig. 5b). Mutations in the PIP-box like motif reduce the stimulation of the nuclease ensemble by RFC-PCNA. The assays were carried out with 5 mM magnesium acetate and 2 mM ATP at 37 °C. Averages shown; error bars, SEM, n=5. **d**, The EXO1<sup>P</sup>(D173A) variant with mutated PIP-box motif (see Fig. 5b) is not affected in its ability to promote the nuclease of hMLH1-hMLH3 and hMSH4-hMSH5 (without RFC-PCNA). The assays were carried out with 5 mM manganese acetate and 2 mM ATP at 37 °C. Averages shown; error bars, SEM, n=4. **e**, The EXO1<sup>P</sup>(D173A) variant with mutated PIP-box motif (see Fig. 5b), in complex with hMLH1-hMLH3 and hMSH4-hMSH5 impairs the stimulatory function of RFC-PCNA (50-100 nM). The assays were carried out with 5 mM magnesium acetate and 2 mM ATP at 37 °C. Averages shown; error bars, SEM, n=5.

## Extended Data Figure 9

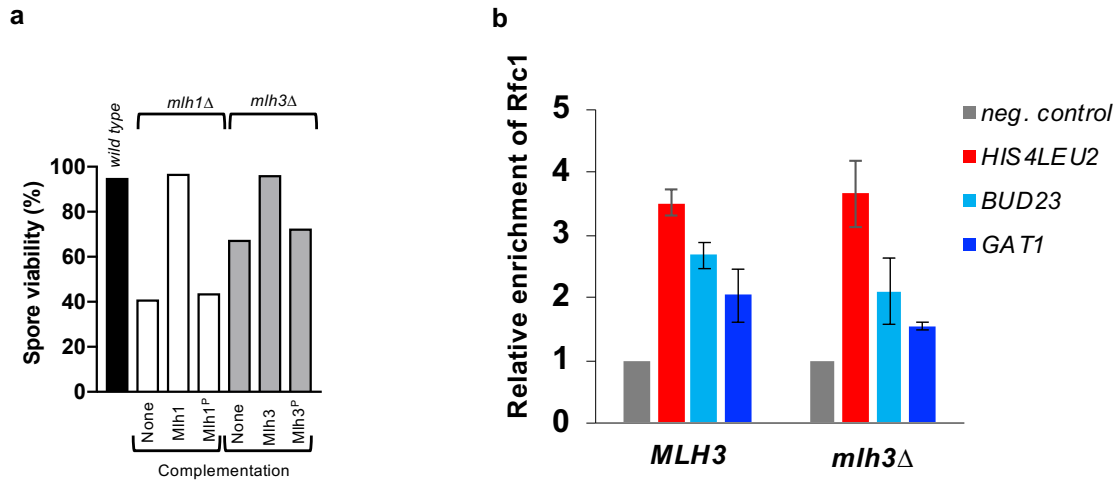

**Extended Data Figure 9. RFC-PCNA regulate meiotic recombination in yeast cells.** **a**, Spore viability upon tetrad microdissection, analyzed in the wild type strain, *mlh1*Δ and *mlh3*Δ, and in strains complemented with a construct expressing Mlh1<sup>P</sup> (Q572A-L575A-F578A) or Mlh3<sup>P</sup> (Q293A-V296A-F300A). At least 156 spores from 2 biological replicates were analyzed for each genotype. **b**, Rfc1-TAP levels at the three indicated meiotic DSB hotspots relative to a negative control site (*NFT1*) were assessed by ChIP and qPCR in *ndt80*Δ arrested cells after 7 h in meiosis. Mlh3 is not required for the recruitment of RFC to the meiotic DSB hotspots. *MLH3*: VBD2136; *mlh3*Δ: VBD2137. Averages show; error bars, SD, n = 2.

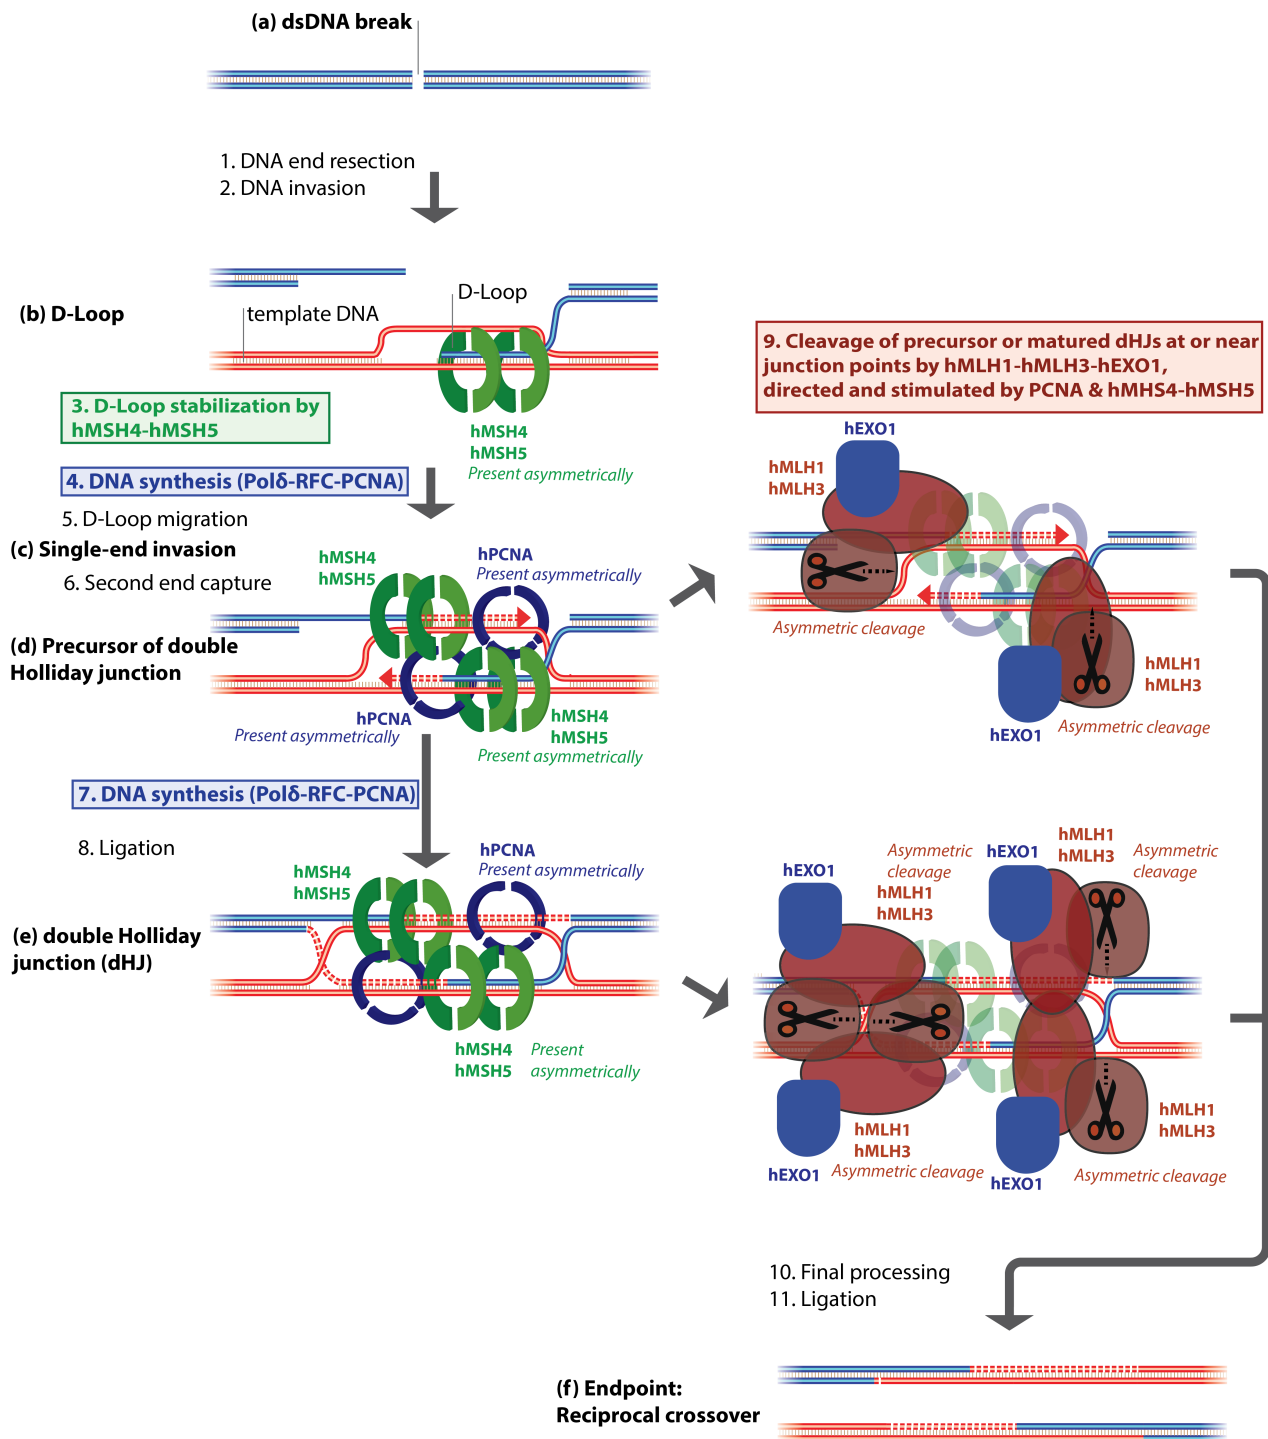

**Extended Data Figure 10. A possible model for biased resolution of recombination intermediates.** Meiotic dsDNA breaks (a) are resected (1) and invade matching DNA on a homologous chromosome (2). The unstable D-Loop intermediates (b) are stabilized by hMSH4-hMSH5 (3), DNA synthesis by RFC-PCNA-Pol $\delta$  (4) and branch migration (5), leading to more stable structures termed single-end invasions (c). This is followed by a second end capture (6), and more DNA synthesis (7) leading to precursors of double Holliday junctions (d) and later matured double Holliday junctions (e). As a result of the previous steps, hMSH4-hMSH5 and RFC-PCNA may be present asymmetrically at the (d) or (e) intermediates at the junction points or their vicinity. The asymmetric presence of the co-factors then directs and stimulates the biased DNA cleavage (9) of (d) or (e) structures by hMLH1-hMLH3-hEXO1. Upon final processing (10) and ligation (11), the ultimate result is a DNA crossover characterized by reciprocal exchange of the DNA arms of the recombining chromosomes.
